# Supplementary material for: Effects of multiple sources of genetic drift on pathogen variation within hosts
Source: PubMed Central journal article supplement (PMC5891033; doi:10.1371/journal.pbio.2004444), 2018-03-28
Supplement: pbio.2004444.s001.pdf [file pbio.2004444.s001.pdf]

# Supplemental Information

1

## 2 **A Data Collection, Sequencing, and Bioinformatics**

3 We collected larvae from outbreaking gypsy moth populations in Michigan between 2000  
4 and 2003 (Fig S1, table S1), and we reared them until death or pupation at 26 °C in the lab in  
5 individual rearing cups containing an artificial wheat-germ diet [1]. Virus-killed larvae can often  
6 be identified visually, but in cases of uncertainty, we examined smears under the microscope for  
7 the presence of occlusion bodies, which are large enough to be apparent at 400× magnification  
8 [2]. Virus-killed cadavers were then transferred to 1.5 ml centrifuge tubes where they were  
9 stored in distilled water at -20 °C.

10 We amplified each virus isolate by passaging it through larvae from the New Jersey Stan-  
11 dard Strain in the late third and early fourth instars (= developmental stages). As we describe  
12 below, we passaged virus through a large number of hosts to avoid introducing a population  
13 bottleneck. To amplify the virus, we used fine-tip transfer pipettes to apply four drops of each  
14 homogenized sample to three 6 oz. plastic rearing cups. Each cup contained approximately 2  
15 oz. of artificial diet. The virus solution was spread across the diet using plastic-bristle paint-  
16 brushes, which were discarded after a single use. Cups were left open to dry for approximately  
17 15 minutes, after which 25 healthy larvae were added to each cup. To confirm that there was no  
18 cross contamination between virus cups, we also mock infected control larvae using distilled  
19 water. No virus-caused deaths occurred in the controls. Post-infection, larvae were inspected  
20 regularly from day 10 to day 18, and intact dead larvae were carefully transferred to 50 ml plas-  
21 tic centrifuge tubes using soft forceps. Following transfers from each cup, the soft forceps were  
22 disinfected with 10% bleach solution and wiped to avoid contamination between virus samples.  
23 Tubes of passaged virus were stored at 4 °C.

24 We isolated virus from these samples using the following protocol. First, we shook each  
25 tube vigorously to release the virus from the cadavers. Second, we removed intact pieces of  
26 host insects by filtering each virus solution through muslin into 1.5 ml centrifuge tubes, after  
27 which the muslin was discarded. Third, we centrifuged each tube for 10 minutes at 5000 × g to  
28 pellet the virus, and we discarded the supernatant. Fourth, we added 1 ml of distilled water, we  
29 homogenized the solution through mixing on a tabletop vortex, and we repeated the centrifuge  
30 step. The pellet was then re-suspended in 500 μl of distilled water and stored at -20 °C.

31 To extract DNA, we followed a modified version of the protocol of [3]. Briefly, we thawed  
32 each virus solution overnight at 4 °C. We then transferred 400 μl of the virus to a new 1.5 ml  
33 centrifuge tube, and added 400 μl of a solution of 2% sodium dodecyl sulfate in distilled water.  
34 Tubes were inverted repeatedly for 1 minute, and stored overnight at room temperature. The  
35 following day, we centrifuged each sample at 5000 × g for 15 minutes. We then discarded the  
36 supernatant, and we re-suspended each pellet in 1 ml of distilled water, before adding 500 μl  
37 of an alkaline solution (0.3 M sodium carbonate, 0.03 M EDTA, 0.51 M sodium chloride in

38 distilled water) to free the virions from the occlusion bodies. We incubated each solution for  
39 1 hour at 37 °C and then centrifuged it at 3000 × g for 5 minutes. Next, we transferred the  
40 supernatant to a new centrifuge tube, we centrifuged each tube at 14,000 × g for 30 minutes,  
41 and we discarded the supernatant. We then re-suspended each pellet in 200 μl of sterile TE  
42 buffer (0.01 M Tris-HCl, 0.001 M EDTA in distilled water) by gently pipetting up and down to  
43 break up the pellet. All samples were stored overnight at room temperature. Next, we released  
44 DNA from the virions by adding 200 μl of extraction buffer (0.01 M Tris-HCl, 0.001 M EDTA,  
45 0.2% potassium chloride, 0.2% sarkosyl in distilled water), and 4 μl proteinase K. We mixed  
46 the tubes by inverting them, and we incubated the solution at 65 °C for 3 hours.

47 To recover the DNA, we used a phenol-chloroform DNA extraction. Following standard  
48 protocol [4], we added 404 μl of 25:24:1 phenol-chloroform isoamyl alcohol to each tube to  
49 generate a 1:1 ratio with the sample by volume. We mixed the tubes by gently inverting them  
50 for 2 minutes. We centrifuged the samples at 14,000 × g for 20 minutes, and we carefully  
51 transferred the top layer to new 1.5 ml centrifuge tubes. Next, we added 480 μl of isopropyl  
52 alcohol to the tubes, we mixed them for 2 minutes by gentle inversion, and we placed them  
53 on ice for 2 hours. We then centrifuged the samples at 3000 × g for 5 minutes and carefully  
54 discarded the supernatant. Next we added 500 μl of 70% ethanol, centrifuged at 3000 × g,  
55 and again discarded the supernatant. The samples were left open under a fume hood for 30  
56 minutes to allow the remaining ethanol to evaporate, after which 20 μl of water was added to  
57 the samples, and they were stored at -20 °C.

58 We quantified the amount of DNA in our samples using a spectrophotometer (NanoDrop  
59 2000c). Because our DNA concentrations were low (< 20 pg/μl), we amplified our samples  
60 using the whole genome amplification REPLI-g UltraFast Mini kit from Qiagen, following the  
61 standard Qiagen protocol. After amplification, DNA concentrations were re-quantified in a  
62 spectrophotometer and then normalized to 50 ng/μl. We used the Nextera DNA Sample Prep  
63 Kit (Illumina-compatible, # GA0911-96), following the standard protocol for use with custom  
64 adaptors, to prepare libraries for Illumina sequencing with custom barcodes. We used the first  
65 96 indexes (table S2) proposed by Meyer and Kircher [5]. After prepping the samples using  
66 Nextera, we again quantified DNA concentrations using a spectrophotometer, and we combined  
67 the samples into 3 libraries, such that each index was used only once in each library.

68 Illumina sequencing was performed at the University of Illinois at Urbana-Champaign. This  
69 sequencing was carried out as two sets of libraries, run on individual lanes of a HiSeq2000 at  
70 96- and 62-plex respectively, producing 100 cycle single-end reads. Samples were separated ac-  
71 cording to barcodes using the standard Illumina pipeline. Control, poor coverage, and duplicate  
72 libraries were excluded from further analysis, leaving us with 143 unique samples.

73 Examination of the reads using FastQC

74 (<http://www.bioinformatics.babraham.ac.uk/projects/fastqc/>)

75 revealed Nextera adaptor contamination. These contaminated sequences were removed using  
76 the wrapper “trim\_galore” with default parameters

77 ([http://www.bioinformatics.babraham.ac.uk/projects/trim\\_galore/](http://www.bioinformatics.babraham.ac.uk/projects/trim_galore/)).

78 We then mapped the remaining sequences to the *Lymantria dispar* multiple nucleopolyhe-

79 drovirus (LdMNPV) reference genome [6] using “bowtie2” [7], with parameter set “very-fast”.  
80 The output “sam” files were converted to “bam” files using “samtools view” [8,9]. “bam” files  
81 were sorted using “samtools sort”, and the sorted files were converted to “mpileup” files using  
82 “samtools mpileup” with minimum mapping quality 20 and minimum sequence base quality  
83 30. Consensus sequences were then generated and variant calling was simultaneously per-  
84 formed using the function “mpileup2cns” in the program “VarScan” version 2.3.9 [10]. Variant  
85 sequences were called at minimum coverage 100. Non-homozygosity was assigned if allele fre-  
86 quencies were between 0.025 and 0.975. The majority allele at every locus was recorded as the  
87 consensus sequence for each sample. Repeating our analyses ignoring adaptor contamination,  
88 and mapping reads with “bowtie” [11], yielded similar results.

89 As is often the case, most sites were conserved both within and between our samples (i.e.  
90 individual infected hosts). Because conserved sites provide little information, we identified  
91 sites that were uniform within samples, but that segregated between at least 7 samples ( $\approx 5\%$ ).  
92 This criterion produced the 712 segregating sites that we focus on in the main text. In Fig S1,  
93 we show the pairwise similarity between each of our samples at these 712 sites. In Fig S2, we  
94 show that the population structure at these 712 sites is low (where populations are defined by  
95 the combination of location and year from which a sample was collected).

96 This pipeline yielded an overall mean genome coverage of 886x per sample, with a range  
97 between samples of 202x to 1497x (Fig S3). In Fig S4, we show the average sequencing depth  
98 at each site in the genome, and we also show that the segregating sites are spread throughout  
99 the virus genome.

100 We also performed BLAST searches for each of our 143 samples to quantify levels of non-  
101 target DNA in our sequence reads. To do this, we converted 10,000 reads from each of our  
102 adaptor trimmed FASTQ files into FASTA format. We ran a ‘blastn’ query for each FASTA  
103 file against the ‘nt’ database using the options ‘max\_target\_seqs 1’ and ‘max\_hsps 1’ to ensure  
104 reporting of only a single match for each read. We recorded the scientific name and the sub-  
105 ject title for each match. In each of our 143 samples, the most common hit was to the gypsy  
106 moth virus LdMNPV. Overall, 90.8% of all reads had their best hit classified as “viruses”. This  
107 percentage varied between samples with a standard deviation of 11.2%. Nevertheless 99.7% of  
108 all reads whose best hit was to a virus showed a best match to LdMNPV, suggesting negligi-  
109 ble contamination from non-LdMNPV viruses. In approximately two thirds of the remaining  
110 samples, the second most common hit was to *Escherichia coli*. To confirm that our estimates of  
111 nucleotide diversity were not influenced by DNA contamination in our samples, we performed  
112 a linear regression of nucleotide diversity on the fraction of reads that mapped to LdMNPV. We  
113 found no significant effect (Fig S5).

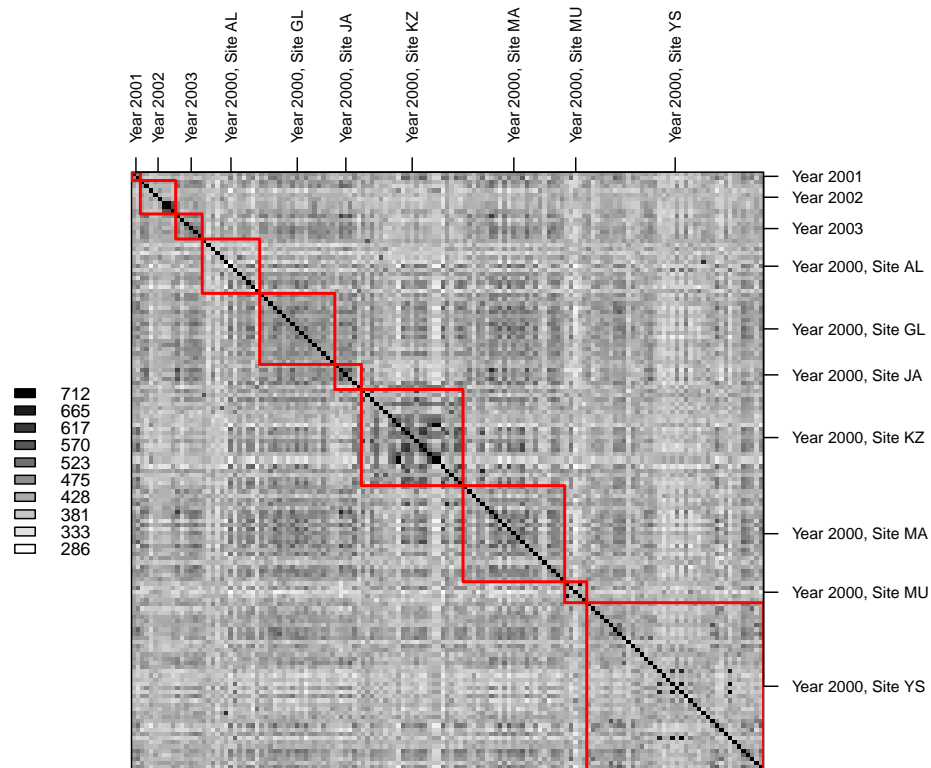

**Figure S1:** Virus strain collection information and pairwise similarity at segregating sites. Samples were collected from 7 sites over 4 years, although most were collected in 2000. Above, each sample was assigned a column and a row, such that the  $n$ th column (read from left to right) represents the same sample as the  $n$ th row (read from top to bottom). Red boxes outline samples collected from the same year, or the same year and collection site for samples collected in 2000. The intensity of the shading of each pixel shows the pairwise similarity between consensus sequences at 712 segregating sites used for downstream analysis. The shading within the red boxes is only slightly more intense than the shading outside the red boxes, indicating that spatial structure in this pathogen is weak. Collection site information is provided in table S1. Values underlying this figure can be calculated using data in S3 Data and S4 Data.

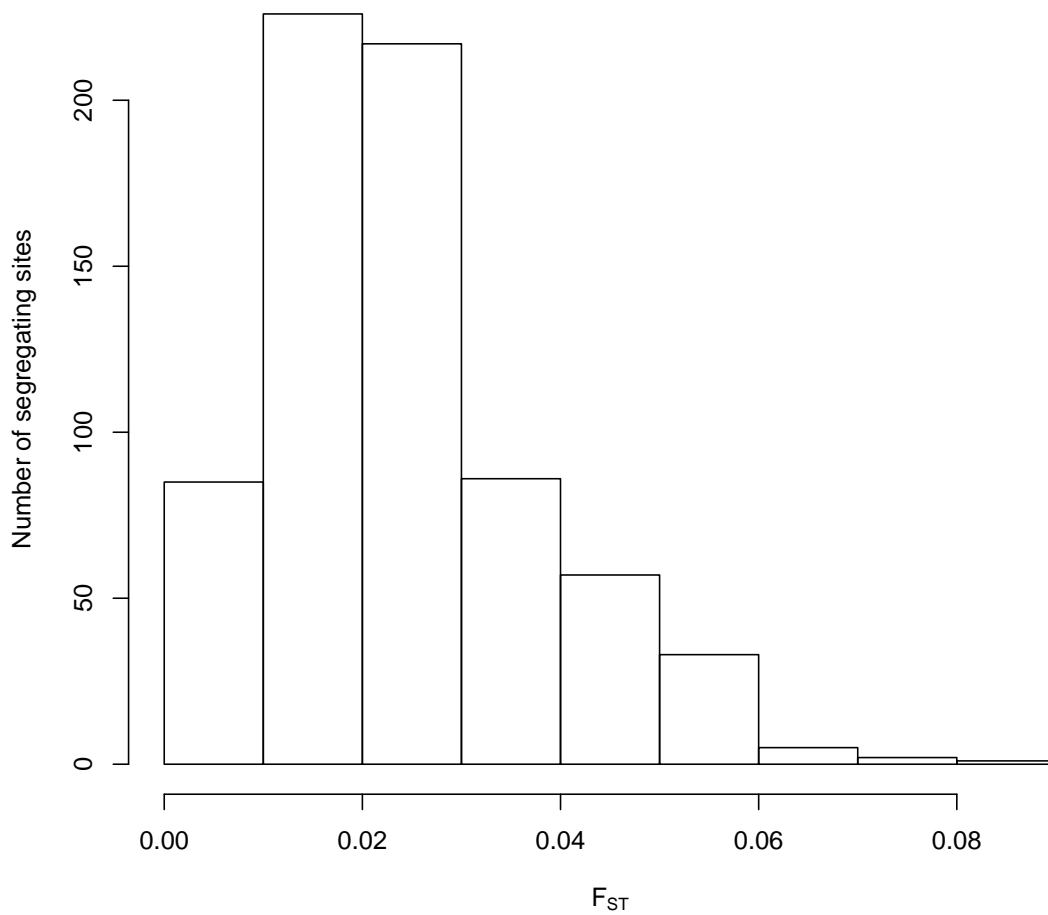

**Figure S2:** Histogram of  $F_{ST}$  values for each of the 712 segregating sites. Populations here are defined as the consensus sequences of samples collected from the same site in the same year. Low  $F_{ST}$  values confirm previous work that there is little population structure in the gypsy moth baculovirus across Michigan [12]. Values underlying histogram are provided in S5 Data.

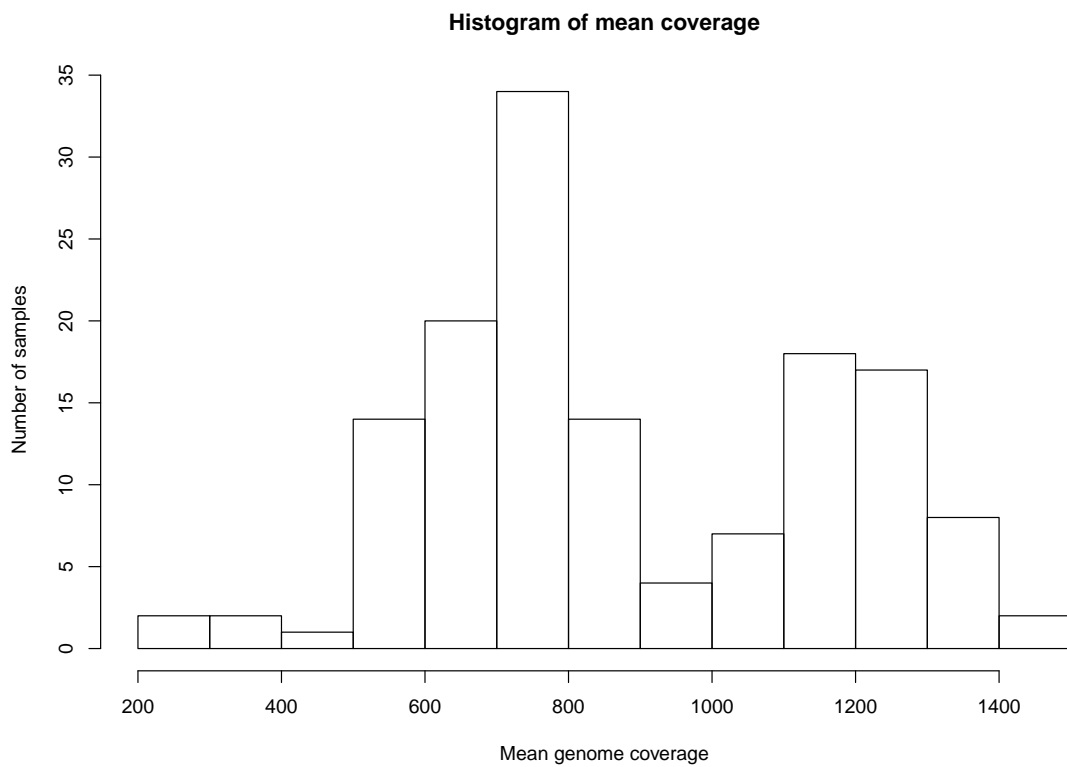

**Figure S3:** Mean genome coverage for each of the 143 sequenced samples. Values underlying histogram are provided in S6 Data.

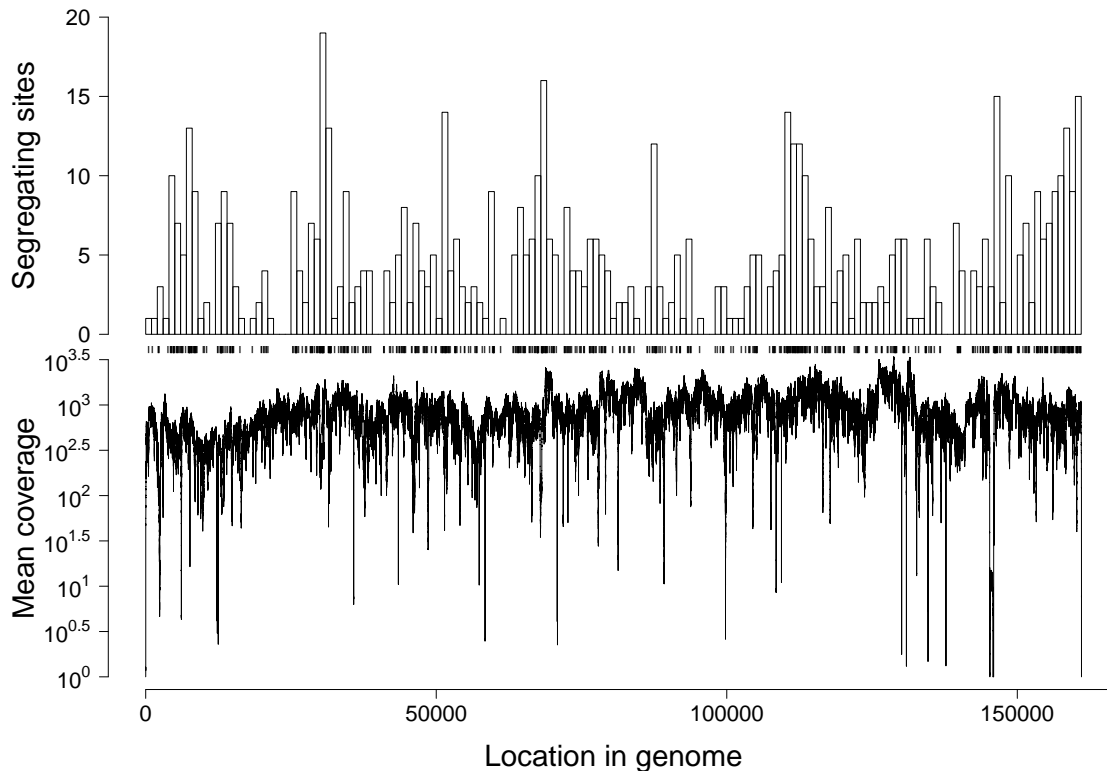

**Figure S4:** Location of segregating sites, and mean sequencing depth across the genome. The top panel shows the location of segregating sites across the genome, with locations corresponding to GenBank accession number NC\_001973.1 [6]. Each segregating site is marked by a vertical slash in the middle of the figure. The bottom panel shows the mean sequencing depth at each site in the genome. Instead of being restricted to sites of particularly high or particularly low sequencing depth, segregating sites are spread throughout the virus genome. Plotted values are provided in S7 Data.

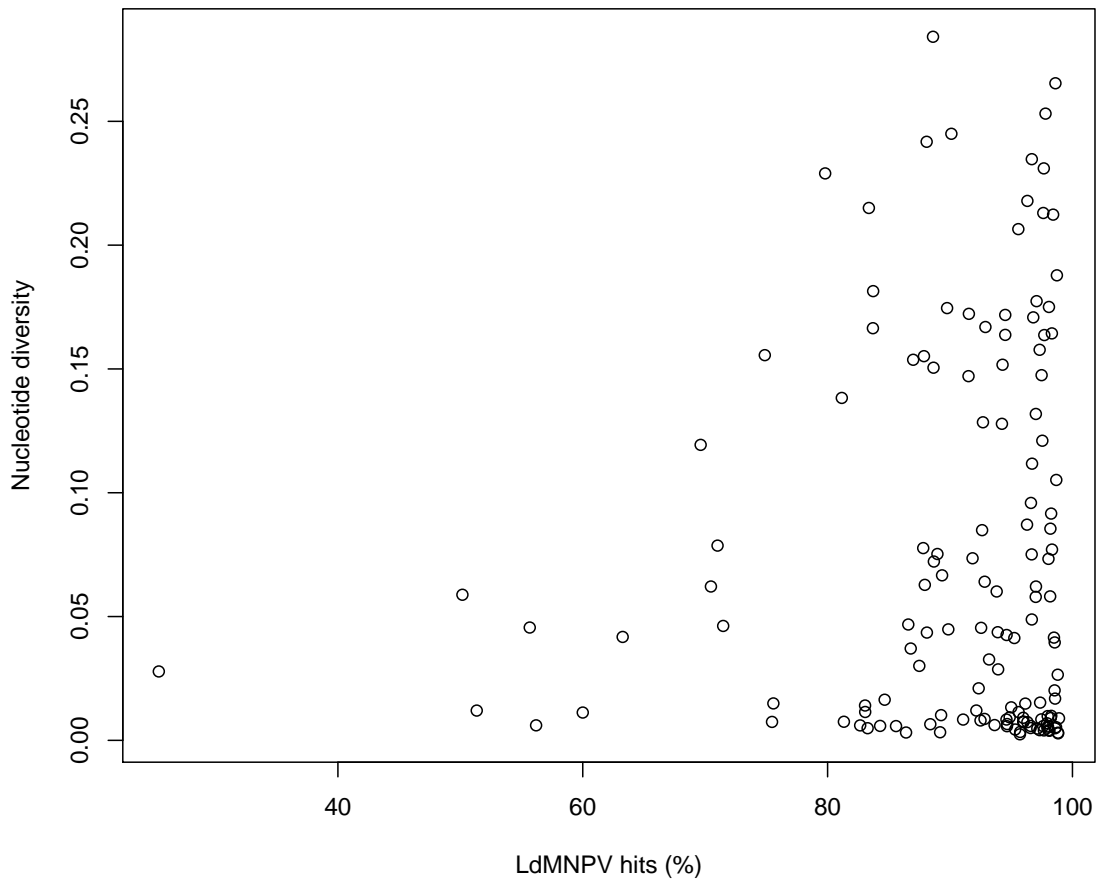

**Figure S5:** Nucleotide diversity versus the percentage of sequence reads with a best hit to LdMNPV. The lack of correlation between these variables suggests that our conclusions are unlikely to have been affected by the presence of non-target DNA. Plotted values are provided in S8 Data.



**Table S1:** Collection site information. All sites are in Michigan, USA. Latitudes and longitudes were estimated using Google Maps, by the recollections of the second author and his field assistant of last resort, Dr. Alison F. Hunter.

| <b>Collection site</b> | <b>Nearest metropolitan area</b> | <b>Latitude</b> | <b>Longitude</b> |
|------------------------|----------------------------------|-----------------|------------------|
| AL                     | Allegan                          | 42.53           | -85.88           |
| GL                     | Gladwin                          | 43.99           | -84.40           |
| JA                     | Jackson                          | 42.27           | -84.36           |
| KZ                     | Kalamazoo                        | 42.37           | -85.52           |
| MA                     | Manistee                         | 44.23           | -86.04           |
| MU                     | Muskegon                         | 43.27           | -86.12           |
| YS                     | Yankee Springs                   | 42.63           | -85.45           |

**Table S2:** Illumina barcodes. Adaptors were designed using the custom barcode template provided by the Illumina-compatible Nextera sample prep kit. Barcode sequences themselves were taken from [5].

| <b>Index ID</b> | <b>Adaptor 2 sequence</b>                                     |
|-----------------|---------------------------------------------------------------|
| INDEX-1         | CAAGCAGAAGACGGCATAACGAGATCCTGGACGGTCTGCCCTTGCCAGCCCCGCTCAG    |
| INDEX-2         | C AAGCAGAAGACGGCATAACGAGATTGCAGAGCGGTCTGCCCTTGCCAGCCCCGCTCAG  |
| INDEX-3         | CAAGCAGAAGACGGCATAACGAGATACCTAGGCGGTCTGCCCTTGCCAGCCCCGCTCAG   |
| INDEX-4         | CAAGCAGAAGACGGCATAACGAGATTGTATCCCGGTCTGCCCTTGCCAGCCCCGCTCAG   |
| INDEX-5         | CAAGCAGAAGACGGCATAACGAGATATCTTGCCGGTCTGCCCTTGCCAGCCCCGCTCAG   |
| INDEX-6         | CAAGCAGAAGACGGCATAACGAGATTCCTCCATCGGTCTGCCCTTGCCAGCCCCGCTCAG  |
| INDEX-7         | CAAGCAGAAGACGGCATAACGAGATCATCGAGCGGTCTGCCCTTGCCAGCCCCGCTCAG   |
| INDEX-8         | CAAGCAGAAGACGGCATAACGAGATTCGAGCCGGTCTGCCCTTGCCAGCCCCGCTCAG    |
| INDEX-9         | CAAGCAGAAGACGGCATAACGAGATAGTTGGTCGGTCTGCCCTTGCCAGCCCCGCTCAG   |
| INDEX-10        | CAAGCAGAAGACGGCATAACGAGATGTACCCGGCGGTCTGCCCTTGCCAGCCCCGCTCAG  |
| INDEX-11        | CAAGCAGAAGACGGCATAACGAGATCGGAGTTCGGTCTGCCCTTGCCAGCCCCGCTCAG   |
| INDEX-12        | CAAGCAGAAGACGGCATAACGAGATACTTCAACGGTCTGCCCTTGCCAGCCCCGCTCAG   |
| INDEX-13        | CAAGCAGAAGACGGCATAACGAGATTGATAGTCGGTCTGCCCTTGCCAGCCCCGCTCAG   |
| INDEX-14        | CAAGCAGAAGACGGCATAACGAGATGATCCAACGGTCTGCCCTTGCCAGCCCCGCTCAG   |
| INDEX-15        | CAAGCAGAAGACGGCATAACGAGATCAGGTCGGGTCTGCCCTTGCCAGCCCCGCTCAG    |
| INDEX-16        | CAAGCAGAAGACGGCATAACGAGATCGCATACGGTCTGCCCTTGCCAGCCCCGCTCAG    |
| INDEX-17        | CAAGCAGAAGACGGCATAACGAGATGGTACCTCGGTCTGCCCTTGCCAGCCCCGCTCAG   |
| INDEX-18        | CAAGCAGAAGACGGCATAACGAGATGGACCGCATCGGTCTGCCCTTGCCAGCCCCGCTCAG |
| INDEX-19        | CAAGCAGAAGACGGCATAACGAGATCCGGTCTGCCCTTGCCAGCCCCGCTCAG         |
| INDEX-20        | CAAGCAGAAGACGGCATAACGAGATGAGCATGCGGTCTGCCCTTGCCAGCCCCGCTCAG   |
| INDEX-21        | CAAGCAGAAGACGGCATAACGAGATGTTGCGTCGGTCTGCCCTTGCCAGCCCCGCTCAG   |
| INDEX-22        | CAAGCAGAAGACGGCATAACGAGATCCAATGCCGGTCTGCCCTTGCCAGCCCCGCTCAG   |
| INDEX-23        | CAAGCAGAAGACGGCATAACGAGATCCGAGATCCGGTCTGCCCTTGCCAGCCCCGCTCAG  |
| INDEX-24        | CAAGCAGAAGACGGCATAACGAGATCATATTGGGGTCTGCCCTTGCCAGCCCCGCTCAG   |
| INDEX-25        | CAAGCAGAAGACGGCATAACGAGATGACGTACGGTCTGCCCTTGCCAGCCCCGCTCAG    |
| INDEX-26        | CAAGCAGAAGACGGCATAACGAGATTGGCATCCGGTCTGCCCTTGCCAGCCCCGCTCAG   |

Continued on Next Page...

Table S2 – Continued

| <b>Index ID</b> | <b>Adaptor 2 sequence</b>                              |
|-----------------|--------------------------------------------------------|
| INDEX-27        | CAAGCAGAAGACGGCATAACGAGATGTAATTGCGGTCTGCCAGCCCCGCTCAG  |
| INDEX-28        | CAAGCAGAAGACGGCATAACGAGATCCCTATCTCGGTCTGCCAGCCCCGCTCAG |
| INDEX-29        | CAAGCAGAAGACGGCATAACGAGATCAATCGGGGTCTGCCAGCCCCGCTCAG   |
| INDEX-30        | CAAGCAGAAGACGGCATAACGAGATGCGGCATCGGTCTGCCAGCCCCGCTCAG  |
| INDEX-31        | CAAGCAGAAGACGGCATAACGAGATGACTGCGGTCTGCCAGCCCCGCTCAG    |
| INDEX-32        | CAAGCAGAAGACGGCATAACGAGATTACTATTGCGGTCTGCCAGCCCCGCTCAG |
| INDEX-33        | CAAGCAGAAGACGGCATAACGAGATCCGGATCCGGTCTGCCAGCCCCGCTCAG  |
| INDEX-34        | CAAGCAGAAGACGGCATAACGAGATACCATGACGGTCTGCCAGCCCCGCTCAG  |
| INDEX-35        | CAAGCAGAAGACGGCATAACGAGATCGGTTCTCGGTCTGCCAGCCCCGCTCAG  |
| INDEX-36        | CAAGCAGAAGACGGCATAACGAGATTATCCACGGTCTGCCAGCCCCGCTCAG   |
| INDEX-37        | CAAGCAGAAGACGGCATAACGAGATCCCTCCCTGCCAGCCCCGCTCAG       |
| INDEX-38        | CAAGCAGAAGACGGCATAACGAGATAGGTATTCGGTCTGCCAGCCCCGCTCAG  |
| INDEX-39        | CAAGCAGAAGACGGCATAACGAGATGCATTCGGGTCTGCCAGCCCCGCTCAG   |
| INDEX-40        | CAAGCAGAAGACGGCATAACGAGATTGGCAACGGTCTGCCAGCCCCGCTCAG   |
| INDEX-41        | CAAGCAGAAGACGGCATAACGAGATTTGAATTCGGTCTGCCAGCCCCGCTCAG  |
| INDEX-42        | CAAGCAGAAGACGGCATAACGAGATCTGCCGGGGTCTGCCAGCCCCGCTCAG   |
| INDEX-43        | CAAGCAGAAGACGGCATAACGAGATAGACC'TTCGGTCTGCCAGCCCCGCTCAG |
| INDEX-44        | CAAGCAGAAGACGGCATAACGAGATGTCCAGTCCGGTCTGCCAGCCCCGCTCAG |
| INDEX-45        | CAAGCAGAAGACGGCATAACGAGATACCCTGCTCGGTCTGCCAGCCCCGCTCAG |
| INDEX-46        | CAAGCAGAAGACGGCATAACGAGATCCGGTACCGGTCTGCCAGCCCCGCTCAG  |
| INDEX-47        | CAAGCAGAAGACGGCATAACGAGATCTTGACCCGGTCTGCCAGCCCCGCTCAG  |
| INDEX-48        | CAAGCAGAAGACGGCATAACGAGATCATCATTCGGTCTGCCAGCCCCGCTCAG  |
| INDEX-49        | CAAGCAGAAGACGGCATAACGAGATTCTGACTCGGTCTGCCAGCCCCGCTCAG  |
| INDEX-50        | CAAGCAGAAGACGGCATAACGAGATTCAGTTCGGTCTGCCAGCCCCGCTCAG   |
| INDEX-51        | CAAGCAGAAGACGGCATAACGAGATGCCATAGCGGTCTGCCAGCCCCGCTCAG  |
| INDEX-52        | CAAGCAGAAGACGGCATAACGAGATACCCTCGGGTCTGCCAGCCCCGCTCAG   |
| INDEX-53        | CAAGCAGAAGACGGCATAACGAGATCTTGGTTCGGTCTGCCAGCCCCGCTCAG  |

Continued on Next Page...

Table S2 – Continued

| <b>Index ID</b> | <b>Adaptor 2 sequence</b>                                    |
|-----------------|--------------------------------------------------------------|
| INDEX-54        | CAAGCAGAAGACGGCATAACGAGATTACGCCCGGGTCTGCCCTTGCCAGCCCCGCTCAG  |
| INDEX-55        | CAAGCAGAAGACGGCATAACGAGATGGACTGCCGGTCTGCCCTTGCCAGCCCCGCTCAG  |
| INDEX-56        | CAAGCAGAAGACGGCATAACGAGATGCCGAGCGGTCTGCCCTTGCCAGCCCCGCTCAG   |
| INDEX-57        | CAAGCAGAAGACGGCATAACGAGATGTCGACGCGGTCTGCCCTTGCCAGCCCCGCTCAG  |
| INDEX-58        | CAAGCAGAAGACGGCATAACGAGATCATAACGTCGGTCTGCCCTTGCCAGCCCCGCTCAG |
| INDEX-59        | CAAGCAGAAGACGGCATAACGAGATTCAGTATCGGTCTGCCCTTGCCAGCCCCGCTCAG  |
| INDEX-60        | CAAGCAGAAGACGGCATAACGAGATCTAAGTACGGTCTGCCCTTGCCAGCCCCGCTCAG  |
| INDEX-61        | CAAGCAGAAGACGGCATAACGAGATTTAGCTTCGGTCTGCCCTTGCCAGCCCCGCTCAG  |
| INDEX-62        | CAAGCAGAAGACGGCATAACGAGATCGCCGTCGCGTCTGCCCTTGCCAGCCCCGCTCAG  |
| INDEX-63        | CAAGCAGAAGACGGCATAACGAGATGCTCTTCGGTCTGCCCTTGCCAGCCCCGCTCAG   |
| INDEX-64        | CAAGCAGAAGACGGCATAACGAGATGCCGGACCGGTCTGCCCTTGCCAGCCCCGCTCAG  |
| INDEX-65        | CAAGCAGAAGACGGCATAACGAGATAAGCTGACGGTCTGCCCTTGCCAGCCCCGCTCAG  |
| INDEX-66        | CAAGCAGAAGACGGCATAACGAGATGCGCTCTCGGTCTGCCCTTGCCAGCCCCGCTCAG  |
| INDEX-67        | CAAGCAGAAGACGGCATAACGAGATCGTAGGCCGGTCTGCCCTTGCCAGCCCCGCTCAG  |
| INDEX-68        | CAAGCAGAAGACGGCATAACGAGATATGATTACGGTCTGCCCTTGCCAGCCCCGCTCAG  |
| INDEX-69        | CAAGCAGAAGACGGCATAACGAGATGCAGGTTCCGGTCTGCCCTTGCCAGCCCCGCTCAG |
| INDEX-70        | CAAGCAGAAGACGGCATAACGAGATAATCGTCCGGTCTGCCCTTGCCAGCCCCGCTCAG  |
| INDEX-71        | CAAGCAGAAGACGGCATAACGAGATCGGCCACCGGTCTGCCCTTGCCAGCCCCGCTCAG  |
| INDEX-72        | CAAGCAGAAGACGGCATAACGAGATCTATGCCCGGTCTGCCCTTGCCAGCCCCGCTCAG  |
| INDEX-73        | CAAGCAGAAGACGGCATAACGAGATGGTTGACGGTCTGCCCTTGCCAGCCCCGCTCAG   |
| INDEX-74        | CAAGCAGAAGACGGCATAACGAGATGAGTTAACGGTCTGCCCTTGCCAGCCCCGCTCAG  |
| INDEX-75        | CAAGCAGAAGACGGCATAACGAGATTAGACTACGGTCTGCCCTTGCCAGCCCCGCTCAG  |
| INDEX-76        | CAAGCAGAAGACGGCATAACGAGATTCATGCACGGTCTGCCCTTGCCAGCCCCGCTCAG  |
| INDEX-77        | CAAGCAGAAGACGGCATAACGAGATGCTTATTCGGTCTGCCCTTGCCAGCCCCGCTCAG  |
| INDEX-78        | CAAGCAGAAGACGGCATAACGAGATCAAGGCTCGGTCTGCCCTTGCCAGCCCCGCTCAG  |
| INDEX-79        | CAAGCAGAAGACGGCATAACGAGATAGGTTGGCGGTCTGCCCTTGCCAGCCCCGCTCAG  |
| INDEX-80        | CAAGCAGAAGACGGCATAACGAGATCTTCTGCCCGGTCTGCCCTTGCCAGCCCCGCTCAG |

Continued on Next Page...

Table S2 – Continued

| <b>Index ID</b> | <b>Adaptor 2 sequence</b>                                      |
|-----------------|----------------------------------------------------------------|
| INDEX-81        | CAAGCAGAAGACGGCATAACGAGATTAATTCGCGTCTGCCCTTGCCAGCCCCGCTCAG     |
| INDEX-82        | CAAGCAGAAGACGGCATAACGAGATGATGCTGCCGCTCTGCCCTTGCCAGCCCCGCTCAG   |
| INDEX-83        | CAAGCAGAAGACGGCATAACGAGATCCTAGAACGGTCTGCCCTTGCCAGCCCCGCTCAG    |
| INDEX-84        | CAAGCAGAAGACGGCATAACGAGATCTAGAGCGGCTCTGCCCTTGCCAGCCCCGCTCAG    |
| INDEX-85        | CAAGCAGAAGACGGCATAACGAGATTATCCGGCGGCTGCCCTTGCCAGCCCCGCTCAG     |
| INDEX-86        | CAAGCAGAAGACGGCATAACGAGATAGGGCGCGGCTCTGCCCTTGCCAGCCCCGCTCAG    |
| INDEX-87        | CAAGCAGAAGACGGCATAACGAGATGGTTCGTTCCGCTTGCCCTTGCCAGCCCCGCTCAG   |
| INDEX-88        | CAAGCAGAAGACGGCATAACGAGATCCGCTGGCGGCTCTGCCCTTGCCAGCCCCGCTCAG   |
| INDEX-89        | CAAGCAGAAGACGGCATAACGAGATGGAACACTACGGTCTGCCCTTGCCAGCCCCGCTCAG  |
| INDEX-90        | CAAGCAGAAGACGGCATAACGAGATAITGGCCACGGTCTGCCCTTGCCAGCCCCGCTCAG   |
| INDEX-91        | CAAGCAGAAGACGGCATAACGAGATATATACCGCGTCTGCCCTTGCCAGCCCCGCTCAG    |
| INDEX-92        | CAAGCAGAAGACGGCATAACGAGATGATTAGCCGGTCTGCCCTTGCCAGCCCCGCTCAG    |
| INDEX-93        | CAAGCAGAAGACGGCATAACGAGATAGAACGCGTCTGCCCTTGCCAGCCCCGCTCAG      |
| INDEX-94        | CAAGCAGAAGACGGCATAACGAGATATAGTACCGGCTCTGCCCTTGCCAGCCCCGCTCAG   |
| INDEX-95        | CAAGCAGAAGACGGCATAACGAGATCTCGCGGCTCTGCCCTTGCCAGCCCCGCTCAG      |
| INDEX-96        | CAAGCAGAAGACGGCATAACGAGATGGTCTGCCGCGGCTCTGCCCTTGCCAGCCCCGCTCAG |

## B Calculating Nucleotide Diversity

To quantify pathogen diversity within individual hosts, we used average nucleotide diversity  $\pi$ , a standard population-genetic statistic used to summarize diversity [13]. In Supplemental Information I, we show that similar results are obtained when using alternative summary statistics such as the effective number of alleles  $A_e$ , the fraction of polymorphic loci  $P$ , and the relative nucleotide diversity  $\hat{\pi}$ . Nucleotide diversity is the probability that any two randomly selected alleles at a particular site in a population would differ if the population were in Hardy-Weinberg equilibrium. It is defined as:

$$\pi = 1 - \frac{1}{n} \sum_{j=1}^n \sum_{i=1}^{k_j} x_{ij}^2. \quad (1)$$

Here  $\pi$  is the nucleotide diversity,  $k_j$  is the total number of allelic variants in the population at site  $j$ ,  $x_{ij}$  is the frequency of allele  $i$  at site  $j$ , and  $n$  is the total number of focal sites. In our case,  $n$  is equal to the 712 segregating sites identified in Supplemental Information A.

Fig S6 shows nucleotide diversity calculated across sites that did not segregate at the population level, demonstrating that nucleotide diversity is negligible at sites not segregating at the population level. Comparison to Fig 3 in the main text strongly suggests that the pathogen diversity that we observed within hosts was due to exposures to multiple pathogen genotypes, and not to mutation or diversifying selection within hosts.

This is not to say, however, that all variation present within hosts can be explained by coinfection, just that a large fraction of it can be. Because segregating sites comprise 0.4% of the genome, the mean nucleotide diversity across the entire genome can be calculated as  $\pi_G = 0.996\pi_{NS} + 0.004\pi_S$ , where  $\pi_G$  is the mean nucleotide diversity calculated across the entire genome,  $\pi_{NS}$  is the nucleotide diversity at non-segregating sites and  $\pi_S$  is the nucleotide diversity at segregating sites.

The fraction of overall variation explained by segregating sites is therefore  $0.004\pi_S/\pi_G$ . In the main text, we report the mean values  $\pi_{NS} = 0.001$  and  $\pi_S = 0.07$ . Accordingly, approximately 23% of the variation can be explained by just the 712 segregating sites. In Fig S7, we show this estimate for each of the 143 samples used in our study. Due to the way nucleotide diversity is calculated, the fraction of variation attributable to segregating sites could only increase if we were more liberal in what we considered to be segregating sites (currently that threshold is somewhat strict, based on a frequency of alternative alleles above about 5% across consensus sequences), and so we are probably underestimating the fraction of variation attributable to coinfection.

In addition, our estimate of nucleotide diversity at non-segregating sites is likely a strong overestimate. This overestimate arises because all next generation sequencing platforms, including the Illumina platform that we used, have high sequencing error rates, and such errors inflate estimates of nucleotide diversity. The low diversity levels at non-segregating sites in our samples (i.e. 0.001) are well within the plausible range for variation generated by sequencing errors alone.

### Histogram of NucleotideDiversity

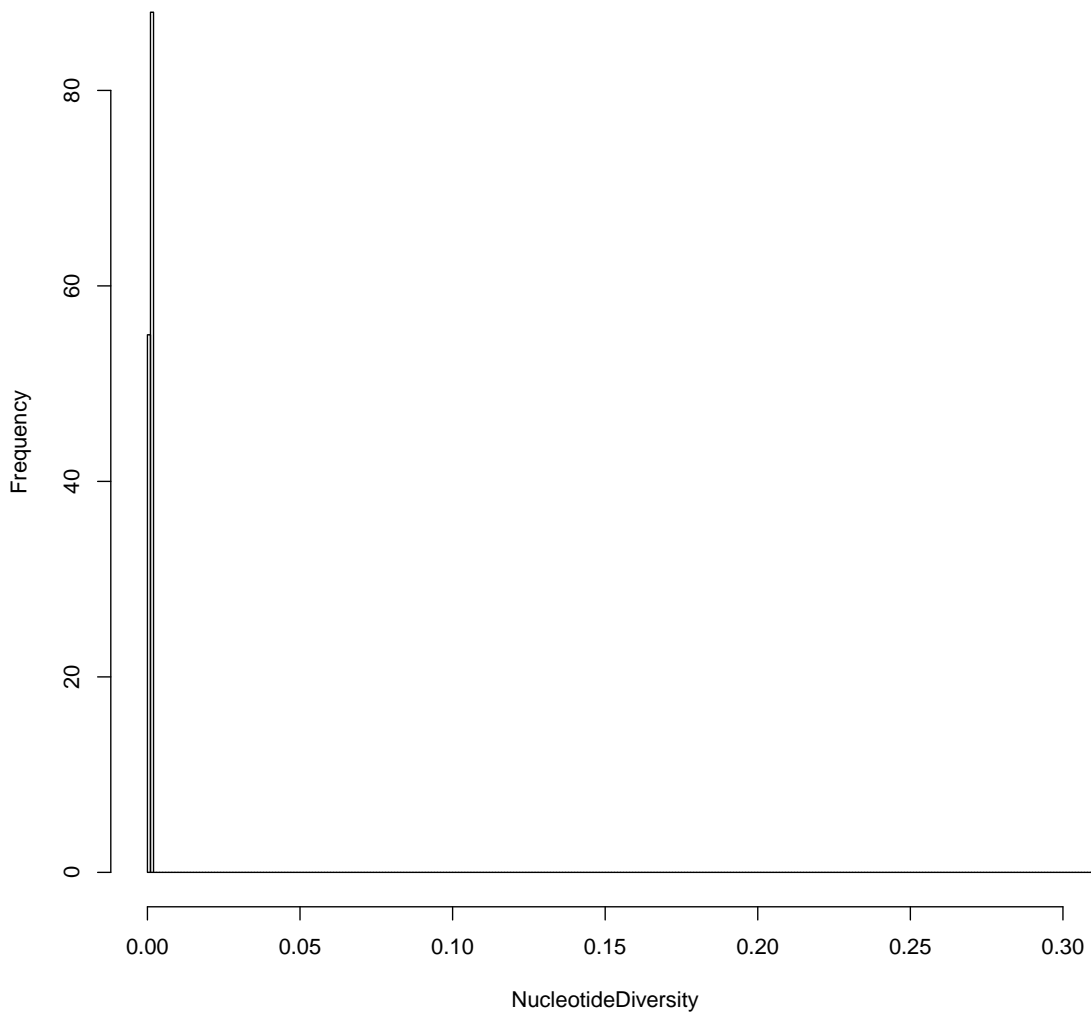

**Figure S6:** Mean nucleotide diversity at sites that are not segregating at the population level. Values underlying this figure can be calculated using data in S4 Data.

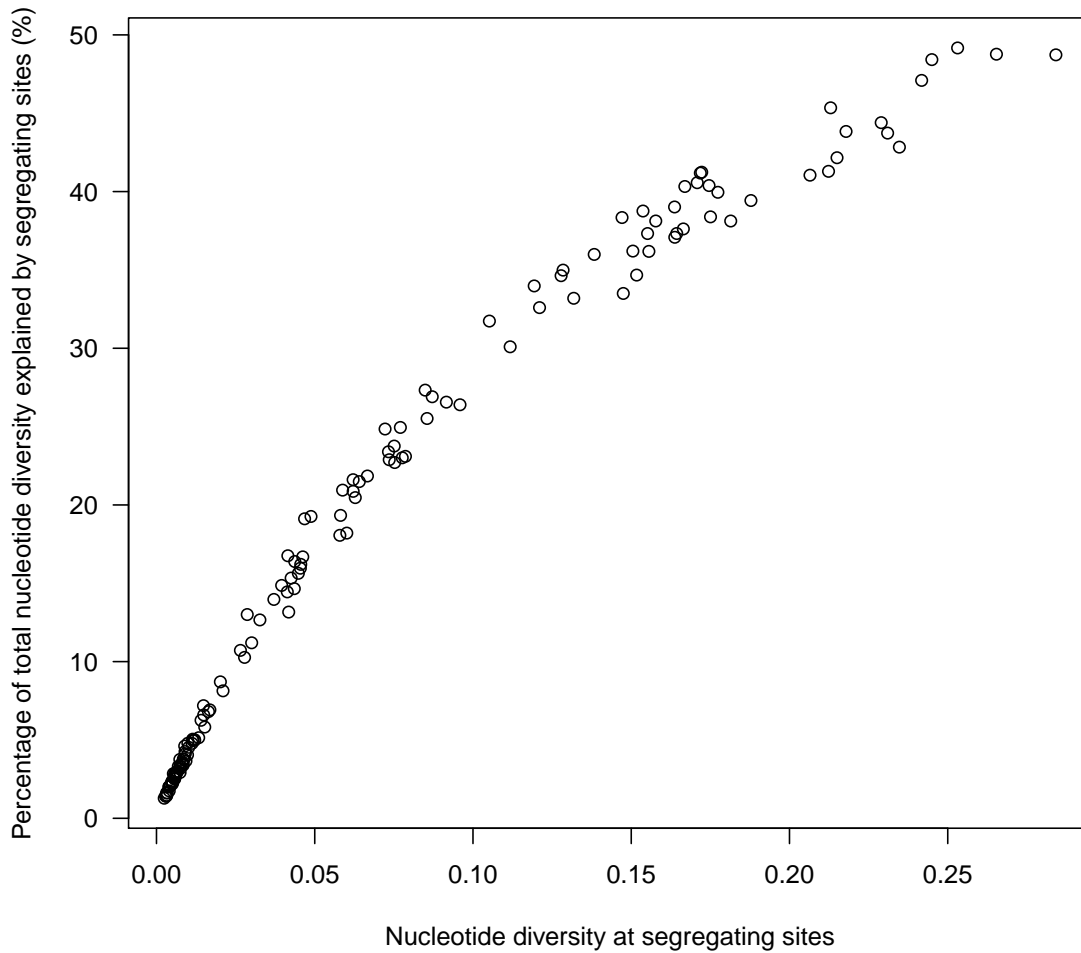

**Figure S7:** Percent of total nucleotide diversity explained by segregating sites. Note that total nucleotide diversity is probably overestimated due to sequencing error, and so the estimates of variation explained by segregating sites are likely conservative. Values underlying this figure can be calculated using data in S4 Data and S8 Data.



## C Nested Model Structure

Our models are nonlinear generalizations of linear birth-death models [14], and so we begin the explanation of the models by first presenting a linear birth-death model. A birth-death model describes probabilistic changes in the size of a population over time, such that the probability of a birth or a death in a small period of time depends on the population size, and only integer population sizes are possible. In the linear case, the model is [15]:

$$P(x_{t+\Delta t} = x_t + 1 | x_t) = rx_t\Delta t + o(\Delta t), \quad (2)$$

$$P(x_{t+\Delta t} = x_t - 1 | x_t) = \alpha x_t\Delta t + o(\Delta t), \quad (3)$$

$$P(x_{t+\Delta t} = x_t | x_t) = 1 - (r + \alpha)x_t\Delta t + o(\Delta t). \quad (4)$$

Here  $x$  is the population size, so that the first equation describes the probability of a birth occurring in the time interval  $(t, t + \Delta t]$ . Because each individual has the same probability of giving birth, the probability of a birth depends on the replication rate  $r$ , the number of individuals  $x_t$ , and a term  $o(\Delta t)$  that describes the probability that multiple events occur in a single time interval  $\Delta t$ . This latter term is assumed to go to zero very rapidly as  $\Delta t$  becomes small ( $\lim_{\Delta t \rightarrow 0} \frac{o(\Delta t)}{\Delta t} = 0$ ). The second equation describes the probability of a death occurring in the time interval  $(t, t + \Delta t]$ , which similarly depends on the death rate  $\alpha$ , the number of individuals  $x_t$ , and the probability that multiple events occur in a single time interval, which again goes to zero rapidly with  $\Delta t$ . The third equation describes the probability that neither a birth nor a death occurs in  $(t, t + \Delta t]$ . Because  $o(\Delta t)$  goes to zero with  $\Delta t$ , the probabilities sum to 1 as  $\Delta t$  goes to zero [15]. In practice, our models include processes that are not found in the linear birth-death model, notably the response of the immune system, but the linear model nevertheless provides a useful introduction to the overall approach of using birth-death models to represent within-host pathogen population growth.

In birth-death models, the pathogen population is founded by the invasion of a discrete number of pathogen particles into the host. In the linear birth-death model in particular, each of these particles has a constant probability of reproducing or dying, and the resulting births and deaths lead to changes in the pathogen population size within the host. If the pathogen population size reaches 0, which might occur by chance if the initial population size is small, the host recovers, but if the pathogen population instead reaches an upper threshold, the host becomes ill. We can thus use the linear birth-death model to describe both the probability of host illness given exposure to the pathogen, and the incubation time, meaning the time between exposure and illness, as long as we specify the threshold at which symptoms occur [16]. As Fig S8 then shows, the model predicts that there will be variability in incubation times, and in the probability of illness, even if hosts are identical, simply because of the stochasticity inherent in the birth-death process. Note that most of the variability in outcomes is due to events that occur shortly after infection, when pathogen population sizes are small.

In previous work with a colleague [17, 18], we extended the linear birth-death model to include the nonlinearities inherent in the insect immune response, thereby producing a model that provides a more realistic description of within-host baculovirus growth. In this model,

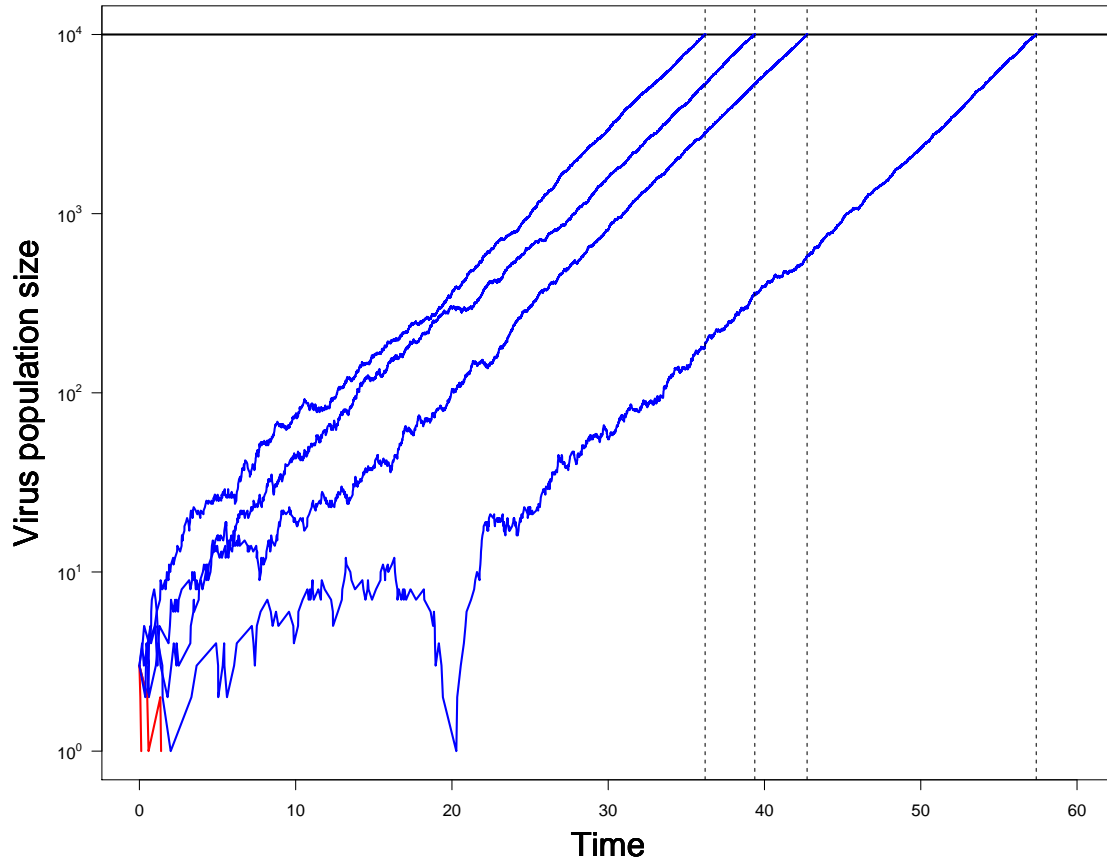

**Figure S8:** Realizations of the linear birth death model (eqs. 2-4). The solid horizontal line is the threshold pathogen population size at which the host dies, and the dashed vertical lines show times of host deaths. Blue lines show realizations in which the host ultimately dies of the infection, and red lines show realizations in which the host recovers and the pathogen goes extinct. Note that when pathogen populations are small, trajectories are highly variable, which in turn creates variation in the time at which pathogen populations reach the size at which hosts die. Parameters: initial pathogen population size  $x_0 = 3$ , pathogen replication rate  $r = 0.7$  per hour, pathogen death rate  $\alpha = 0.5$  per hour, threshold for death  $C = 10^4$  pathogen particles.

187 after a few pathogen particles colonize the host, the particles may again reproduce, as in the  
 188 linear model, but they may also be bound and destroyed by host immune cells. In insects and  
 189 other invertebrates, immune cells release chemicals that activate the phenol-oxidase pathway,  
 190 ultimately resulting in the encapsulation and destruction of pathogen particles [19, 20]. The  
 191 pathogen population may therefore fall to zero because of interactions with the host immune  
 192 system, in which case the host recovers from infection, but the immune system may also be  
 193 overwhelmed by the pathogen, leading to runaway pathogen growth and host death. Accord-  
 194 ingly, instead of the linear model probabilities in eqs. (2)-(4), we have:

$$P(x_{t+\Delta t} = x_t + 1, y_{t+\Delta t} = y_t | x_t, y_t) = rx_t\Delta t - o(\Delta t), \quad (5)$$

$$P(x_{t+\Delta t} = x_t - 1, y_{t+\Delta t} = y_t - 1 | x_t, y_t) = \beta x_t y_t \Delta t - o(\Delta t), \quad (6)$$

$$P(x_{t+\Delta t} = x_t, y_{t+\Delta t} = y_t | x_t, y_t) = 1 - rx_t\Delta t - \beta x_t y_t \Delta t - o(\Delta t). \quad (7)$$

195 Here,  $x_t$  and  $y_t$  are the respective population sizes of virus particles and immune cells at time  $t$ ,  
 196  $r$  is the virus replication rate, and  $\beta$  is the rate at which immune cells encounter and encapsu-  
 197 late pathogen particles. We extend this model, without changing the dynamics in any way, by  
 198 replacing  $x_t$  with  $\sum_{i=1}^{x_0} x_{t,i}$  where  $x_0$  is the initial number of virus particles (*not* the number of  
 199 unique virus strains) that founded the infection, and  $x_{t,i}$  denotes the population size resulting  
 200 from founder virion  $i$  at time  $t$ . Note the distinction between  $x_t$ , the total virus population size  
 201 at time  $t$ , and  $x_{t,i}$ , the population size of virus particles resulting from virus founder  $i$  at time  $t$ .  
 202 The population size resulting from each founder virion can then be explicitly tracked by rewrit-  
 203 ing eq. (5) as a set of  $x_0$  equations, where  $x_t$  is replaced with  $x_{t,i}$ . We set  $x_{0,i}$  equal to 1 for all  
 204  $i$ , such that each of these  $x_0$  equations describes the population size resulting from a different  
 205 founder. A crucial point is that multiple founder virus particles may be identical in terms of  
 206 virus strain identity. To determine the fraction of a cadaver that is comprised of any particular  
 207 virus strain therefore requires first determining which of the  $x_0$  virus lineages match the strain  
 208 of interest. We similarly expand eq. (6). This formulation of the model allows us to explicitly  
 209 capture changes in the virus population composition that are due to replicative genetic drift.

210 The model defined by the above probabilities describes the stochastic population growth that  
 211 underlies the genetic drift of pathogen populations inside their hosts. To allow for transmission  
 212 bottlenecks, we include a submodel that describes the reduction in the pathogen population size  
 213 that occurs at transmission. In the gypsy moth baculovirus, for example, an infected cadaver  
 214 releases on the order of  $10^9$  infectious occlusion bodies [21], but the number of virus particles  
 215 that successfully invade a host is only 10–100, reflecting a transmission bottleneck [17]. We  
 216 therefore assume that the initial number of pathogen particles follows a Poisson distribution,  
 217 according to;

$$x_0 \sim \text{Poisson} \left( \frac{c_1 D}{c_2 + D} \right), \quad (8)$$

218 Here  $x_0$  is again the initial number of virus particles that colonize a host. To allow for saturation  
 219 of pathogen invasion sites, the mean of this distribution is calculated from a Michaelis-Menten

220 function, such that the mean number of colonizing particles is a saturating function of the dose  
221  $D$ , with parameters  $c_1$  and  $c_2$ . By defining the initial number of immune cells  $y_0 \equiv m$ , and  
222 specifying the virus population size  $C$  at which host death occurs, we have fully described  
223 the dynamics of our within-host model. To explicitly model genetic drift due to transmission  
224 bottlenecks, we randomly sample  $x_0$  virus genomes with replacement from the population of  
225 virions that comprises the infectious cadaver to which a host was exposed. Specifically, virus  
226 strains are sampled using a multinomial distribution, in which the probability of sampling a  
227 particular strain depends on its frequency in the infectious cadaver. This produces  $x_0$  virus  
228 particles that can then be tracked using eqs. (5)-(7). Reinfections are treated in the same way  
229 as primary infections. If multiple host exposures occur, the host dies at the time that the total  
230 number of particles first exceeds the host-death threshold. The frequency of each virus strain at  
231 the time of host death then becomes the frequency of each strain in the newly generated cadaver.  
232 We allowed for 50 unique virus genotypes, but using larger numbers of strains had negligible  
233 effects on our results.

234 The above text describes the model that includes drift due to both transmission bottlenecks  
235 and replicative genetic drift. To remove replicative genetic drift, we again used eqs. (5)-(7)  
236 to determine the time of death, but we no longer tracked the identity of each individual virus  
237 particle during growth within hosts. The time to death is therefore the same, but the composition  
238 of the virus population is unaffected by stochasticity during growth within hosts. To eliminate  
239 transmission bottlenecks, we removed the sampling process during virus colonization, such that  
240 the virus community infecting a host was identical in composition to the community to which  
241 the host was exposed. Finally, to add purifying selection, we allowed hosts to be resistant to a  
242 subset of virus strains. The three alternative models are described in more detail later in this  
243 section.

244 We tracked a fixed number of virus strains (i.e. 50) that changed in relative and absolute  
245 frequency over time, but otherwise did not change. These simulated strains varied at 712 loci,  
246 to match the variability in our sequence data (further described in Supplemental Information F).  
247 We therefore did not include mutation or recombination in any of the models presented in the  
248 main text. These simplifications are justified by the biology of the system, and they allowed us  
249 to greatly improve the tractability of the system, by tracking a fixed number of strains (i.e. 50).  
250 Although there are no estimates of baculovirus mutation rates, data from other double stranded  
251 DNA viruses suggests that mutation rates are likely to be on the order of  $10^{-7}$  substitutions  
252 per locus per infected cell [22]. In Supplemental Information E, we show that this mutation  
253 rate generates too little variation to explain our data, and that in fact, no mutation rate can  
254 simultaneously explain both the high and low diversity infections seen in our data. We also are  
255 unaware of any estimates of baculovirus recombination rates, but given that recombination is  
256 not a necessary part of the baculovirus lifecycle, the frequency of recombination is probably  
257 small over ecological timescales.

258 Realizations of our within-host model show that most of the variability in the time at death  
259 is due to events that occur early on in the infection (Fig S9), as in the linear birth-death model  
260 (Fig S8). Comparison of Fig S9 and Fig S8, however, makes clear that allowing for the non-

261 linearities inherent in the immune system slows the growth of the virus population early in the  
 262 infection. Because the immune system thus keeps pathogen population sizes low for longer, it  
 263 strengthens the effects of drift.

264 The nonlinear birth-death model is used once a host becomes infected, to determine whether  
 265 the host will die of the infection, and if so, when death will occur. To determine whether a host  
 266 becomes infected in the first place, we use a stochastic SEIR model, modified to allow for host  
 267 variation in infection risk [23,24], and to allow the birth-death model to determine the time until  
 268 death, and the probability of death. In our selection model, a host only dies if the cadaver that  
 269 initiated the infection also contains at least one virus strain to which that the host is susceptible.  
 270 Allowing our birth-death model to determine virus dynamics within hosts is crucial, because  
 271 the within host dynamics drive replicative drift. The resulting distribution of times to death is  
 272 nevertheless roughly similar to a gamma distribution [17], which determines the time to death  
 273 in standard SEIR models. It is therefore worth observing that, if incubation times within hosts  
 274 did follow a gamma distribution, then the deterministic equivalent of our stochastic SEIR model  
 275 would be:

$$\frac{dS}{dt} = -\bar{\nu}SP \left[ \frac{S(t)}{S(0)} \right]^V, \quad (9)$$

$$\frac{dE_1}{dt} = \bar{\nu}SP \left[ \frac{S(t)}{S(0)} \right]^V - k\delta E_1, \quad (10)$$

$$\frac{dE_i}{dt} = k\delta E_{i-1} - k\delta E_i, \text{ for } i = 2, \dots, k, \quad (11)$$

$$\frac{dP}{dt} = k\delta E_k - \mu P. \quad (12)$$

276 Here,  $S$  and  $P$  are the densities of healthy hosts and infectious cadavers, respectively, while  
 277  $E_i$  is the density of exposed but not yet infectious hosts in exposure class  $i$ . Allowing for  $k$   
 278 exposed classes produces a gamma distribution of times to death, with mean  $1/\delta$  and coefficient  
 279 of variation (C.V.)  $1/\sqrt{k}$  [25]. Previous work has shown that infection risk varies greatly across  
 280 individuals, in both gypsy moths [23, 24, 26, 27] and other insects [28], and this variation is  
 281 represented by the transmission term  $\bar{\nu} \left[ \frac{S(t)}{S(0)} \right]^V$ , such that the initial mean transmission rate is  
 282  $\bar{\nu}$  and the squared C.V. of transmission rates is  $V$  [29].

283 Using a Gillespie algorithm, it is straightforward to simulate a version of this SEIR model  
 284 that allows for the effects of demographic stochasticity [25], the stochasticity due to small  
 285 population sizes during the epizootic. Such a model, however, would not allow for the effects  
 286 of drift due to population bottlenecks, or for stochastic population growth inside the host, nor  
 287 would it allow for the possibility that hosts become infected by more than one virus strain.  
 288 In allowing for demographic stochasticity, we therefore modified the stochastic version of the  
 289 SEIR model such that the times between infection and death for individual hosts are generated  
 290 through simulation of the within-host growth model, instead of being drawn from a gamma  
 291 distribution. Also, the SEIR model assumes that all exposed hosts die, but in our stochastic

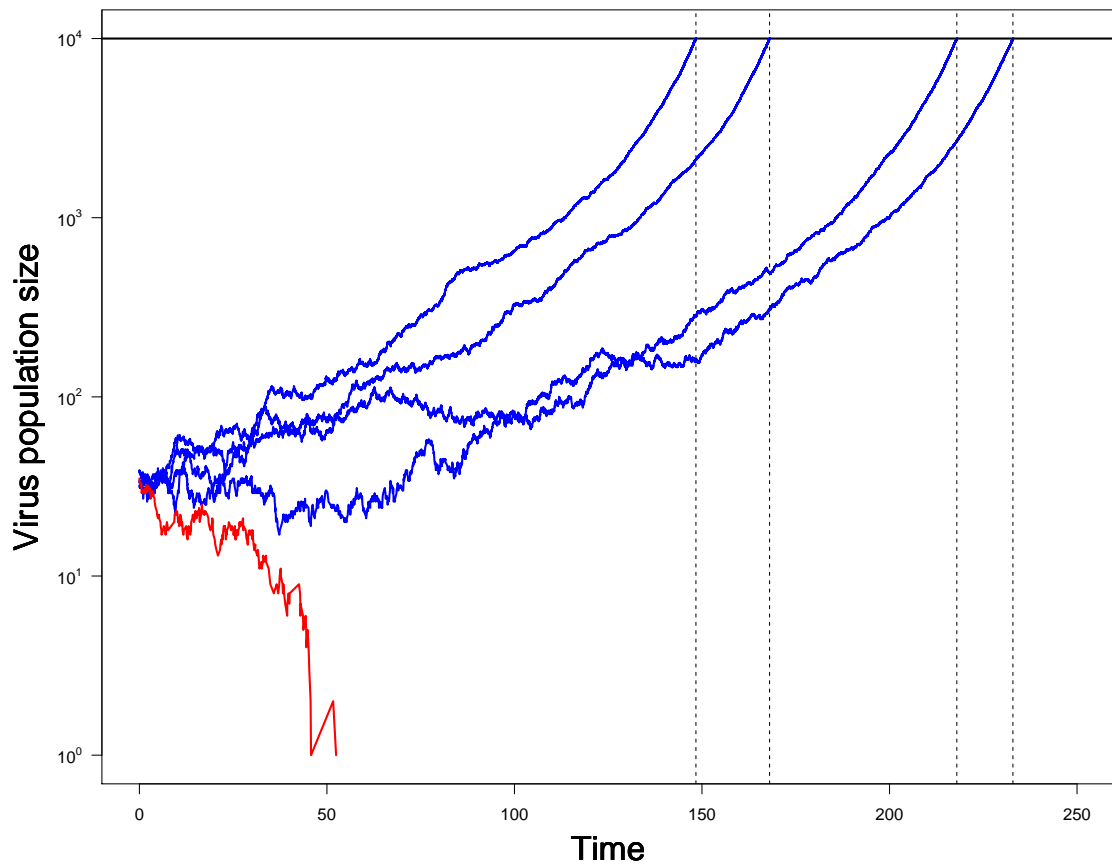

**Figure S9:** Realizations of the nonlinear birth death model (eqs. 5-8). In contrast to Fig S8, this model includes effect of the immune system. Parameter values are the same as in the nested-model simulations in the main text (table S3), except that to aid visualization, here we set the pathogen population size at host death  $C = 10^4$  pathogen particles.

292 model, whether an exposed host dies or recovers is instead determined by the within-host growth  
 293 model. The effect is that our within-host pathogen growth model is nested inside our version of  
 294 the stochastic SEIR model. A final difference from the standard SEIR model is that we allow  
 295 pathogen haplotypes to infect not just uninfected hosts, but also infected hosts, to allow for the  
 296 possibility of multiple exposure events in the same host individual.

297 The Gillespie algorithm relies on the memorylessness of the exponential distribution, but  
 298 in our nested model, the time until host death depends on the virus population within the host,  
 299 leading to a distribution of times to death that is not memoryless. To simulate our model, we  
 300 therefore instead use an algorithm developed by [30], which generalizes the Gillespie algorithm  
 301 to allow for non-exponential event times. The steps in this algorithm are as follows: 1) Cal-  
 302 culate the time at which the next exponentially distributed event will occur, as in the Gillespie  
 303 algorithm; 2) Calculate the time at which the next non-exponentially distributed event will oc-  
 304 cur; 3) Use the minimum of 1 and 2 to determine the next event to occur, and update the time  
 305 and the population sizes accordingly; 4) Return to step 1.

306 In the resulting model, there are three types of events; a host can contact the virus, a previ-  
 307 ously exposed host can die of an infection, or an infectious cadaver can cease to be infectious.  
 308 The times to these respective events are;

$$t_e \sim \text{Exponential}\left(\sum_{i=1}^{n_t} \bar{\nu} h_i I_t\right), \quad (13)$$

$$t_d = \text{Min}(T_1, \dots, T_l) - t, \quad (14)$$

$$t_r \sim \text{Exponential}(\mu I_t). \quad (15)$$

309 Here  $T_1, \dots, T_l$  are the times of death as predicted by the within-host model. Also,  $t_e$  is the  
 310 time until the next host is exposed to the pathogen,  $t_d$  is the time until the next host dies of the  
 311 pathogen, and  $t_r$  is the time until the next infectious cadaver decays and is therefore removed  
 312 from the system.

313 Previous work has shown that constructing models that accurately describe baculovirus epi-  
 314 zootics in gypsy moth populations requires an allowance for variation in infection risk across  
 315 individuals, as in eqs. (9)-(12) [23, 29]. To adapt that model to allow for stochasticity, here we  
 316 assume that  $\bar{\nu} h_i$  is the infection risk of individual  $i$ , such that  $\bar{\nu}$  is the average transmission rate,  
 317 and  $h_i$  is a gamma-distributed random variate with mean 1 and coefficient of variation  $CV$ . The  
 318 symbol  $I_t$  is the number of infectious cadavers at time  $t$ ,  $n_t$  is the number of hosts that are alive  
 319 at time  $t$ ,  $l$  is the total number of exposed hosts in the population, and  $\mu$  is the decay rate of the  
 320 virus. Given these definitions, we calculate the time to the next event as the minimum of  $t_e$ ,  $t_d$   
 321 and  $t_r$ .

322 Generating even a single realization of the full model requires a great deal of computing  
 323 time. To increase computational efficiency, we therefore calculated times to death  $T_j$  and the  
 324 accompanying within host virus dynamics by selecting within-host trajectories from a sample  
 325 of  $10^6$  trajectories simulated before we simulated the full model. With this change, single  
 326 realizations of the model can be completed within two days.

327 The nested epizootic model can be used to simulate the dynamics of the system within a  
 328 single year, but to allow for long-term host-pathogen population dynamics, and thus pathogen  
 329 evolution, we extended the model to allow for multiple host generations. Like many outbreaking  
 330 forest insects [31], the gypsy moth has only one generation per year, and so our long-term model  
 331 is based on a set of difference equations, which allow for natural selection and genetic drift in the  
 332 host, over-wintering in the pathogen, and more generally for the long-term population dynamics  
 333 of the host and the pathogen [24, 29]:

$$N_{g+1} = 1 + \sum_{i=1}^{N_g} (\bar{v}_g h_i \lambda + b) \psi_i, \quad (16)$$

$$Z_{g+1} = 1 + \gamma Z_g + \phi \sum_{i=1}^{N_g} |\psi_i - 1|, \quad (17)$$

$$\bar{v}_{g+1} = \frac{1}{N_{g+1} - 1} \sum_{i=1}^{N_g} \bar{v}_g h_i (\bar{v}_g h_i \lambda + b) \psi_i. \quad (18)$$

334 Here,  $N_g$  and  $Z_g$  are the number of susceptible hosts and infectious cadavers in generation  $g$ ,  
 335 and  $\bar{v}_g$  is the mean exposure risk of hosts in generation  $g$ . To explain the model, we begin with  
 336 equations (16) and (17). On the right-hand side of these equations, we include a 1 to allow for  
 337 the immigration of a single host and a single infectious cadaver in each host generation. Given  
 338 that the number of uninfected hosts and infectious cadavers is generally above  $10^3$ , this low  
 339 level of migration had only very modest effects on the dynamics of the model, while neverthe-  
 340 less serving to prevent extinction of the host and the pathogen, which would otherwise have  
 341 happened at least sporadically. In the host equation (16), the symbol combination  $\bar{v}_g h_i$  is the  
 342 realized exposure risk of host  $i$  in generation  $g$ , while  $b$  is the baseline reproductive rate of the  
 343 host. Also,  $\lambda$  is the rate at which host fecundity increases with increasing host susceptibility,  
 344 representing a tradeoff between fecundity and resistance that has been shown to occur in the  
 345 gypsy moth [32, 33]. The symbol  $\psi_i$  is an indicator variable, such that  $\psi_i = 0$  indicates that host  
 346  $i$  has died from infection and  $\psi_i = 1$  indicates that host  $i$  has survived to reproductive age, so  
 347 that the term  $\sum_{i=1}^{N_g} (\bar{v}_g h_i \lambda + b) \psi_i$  is the total reproductive output of the surviving hosts.

348 We use  $\psi_i$  again in equation (17), in which the summation  $\sum_{i=1}^{N_g} |\psi_i - 1|$ , is the total num-  
 349 ber of virus-killed hosts in generation  $g$ . The symbol  $\phi$  describes the effective overwintering  
 350 survival of cadavers produced in generation  $g$ , by which we mean that  $\phi$  takes into account both  
 351 the over-winter survival of infectious cadavers, and the high susceptibility of hatchling larvae  
 352 in generation  $g + 1$  [27], following previous work that showed that  $\phi > 1$  [34]. The symbol  $\gamma$   
 353 is the overwintering survival of cadavers over longer time intervals.

354 Equation (18) describes the change in the mean exposure risk in the host population, which  
 355 may be due either to selection for increased resistance during the epizootic, or to selection for  
 356 increased fecundity during host reproduction (for simplicity, we assume that the host variation  
 357 parameter  $CV$  is constant). Accordingly, the term  $(\bar{v}_g h_i \lambda + b) \psi_i$  is the number of offspring



358 produced by host  $i$ . We then calculate the average exposure risk in the next generation by  
359 summing the expected risk for each of these offspring,  $\bar{v}_g h_i$ , and dividing by the total number  
360 of new offspring,  $N_{g+1} - 1$ , where the one accounts for the immigrant host.

361 It is important to emphasize that our long-term model uses our stochastic SEIR model to  
362 calculate the number of hosts that survive the epizootic, and to calculate the number of hosts  
363 that are converted into infectious cadavers. The stochastic SEIR model is thus nested inside  
364 the long-term model, just as the within-host pathogen growth model is nested inside the SEIR  
365 model.

366 We simulated our models for 100 generations, because longer realizations produced nearly  
367 identical results. Because larvae can only be collected during outbreak years, when gypsy  
368 moth populations are at high densities, we extended each realization until the host population  
369 exceeded  $10^4$  and at least  $2 \times 10^3$  hosts had died of the pathogen, to mimic the conditions under  
370 which our samples were collected. At the end of each realization, we recorded the composition  
371 of virus strains that comprised the pathogen population of each simulated virus-killed host.

372 To simulate within-host dynamics, we used parameter estimates from our previous work  
373 with a colleague [18], in which we fit the within-host model to speed of kill data from a dose-  
374 response experiment. Because the previous work was carried out in the lab, it did not provide  
375 an estimate of typical virus doses under field conditions. We therefore assumed an initial dose  
376 of  $D = 10000$ , which corresponds to  $\approx 90\%$  of the maximum effective dose. This value of  
377  $D$  is consistent with the observation that virus doses in the field tend to be very high [35], and  
378 our conclusions are nevertheless robust to this value (Supplemental Information D). All model  
379 parameters and their values are listed in table S3.

380 To simulate host-pathogen population dynamics, we used parameter estimates from previ-  
381 ous work [24, 27]. The duration of each epizootic was 8 weeks, matching epizootics seen in  
382 gypsy moth populations in nature [36]. The value of the parameter  $\lambda$  determines the strength  
383 of selection for the increased fecundity that results from increased host infection risk, and it  
384 therefore affects the value of the average transmission rate  $\bar{v}_g$  in generation  $g$ . Because the  
385 value of  $\lambda$  is poorly known, we selected  $\lambda = 10^8$ , which gave average fecundity values between  
386 0.3 and 260 offspring per host, similar to the range in egg mass sizes typically observed in  
387 nature [37]. We set the host heterogeneity in susceptibility  $CV = 2.5$ , and the effective virus  
388 over-wintering parameter  $\phi = 20$ , each falling within the range of values calculated from previ-  
389 ous work [24, 27]. These values produced population cycles with a period of roughly 8 years  
390 and an amplitude of 3 orders of magnitude, matching the period and amplitude of cycles seen  
391 in nature [38, 39].

392 In the purifying selection model, the probability of a host being susceptible to a particular  
393 virus strain was set to  $\rho = 0.9$ , based on previous dose-response data, which showed that the  
394 probability of a host being susceptible to a particular virus strain is at least  $\rho = 0.97$ , plus or  
395 minus 0.03 [40]. This estimate is close to  $\rho = 1$ , which would exactly replicate the model that  
396 lacks both transmission bottlenecks and replicative drift. To distinguish our selection model  
397 from this other model, we therefore assumed a value of  $\rho$  that was approximately 2 standard  
398 errors lower than its best empirical estimate. In Supplemental Information G, we show that

399 reducing the value of  $\rho$  improves the fit of the model to the data, but the selection model cannot  
400 compete with our best drift model for any reasonable value of  $\rho$ .

401 Note that all parameters were chosen before we compared the output of our models to our  
402 nucleotide-diversity data, and that the value of each parameter was the same in each of the four  
403 models that we compared to the nucleotide diversity data, with the exception of  $\rho$ , which was  
404 set to 1 in the neutral models and 0.9 in the purifying selection model. Adjusting the model  
405 likelihood values to allow for differences in the number of model parameters would therefore  
406 have no effect on model selection, since none of the model parameters are free parameters.

407 As we described in the main text, we considered four models. The most complex model  
408 includes both transmission bottlenecks and replicative drift, but we also constructed three al-  
409 ternative models by sequentially removing these two sources of genetic drift from the most  
410 complex model, and by adding purifying selection. First, we eliminated replicative drift by  
411 assuming that the ratio of pathogen strains at host death is the same as the ratio of pathogen  
412 strains that results from the transmission bottleneck. The resulting model thus assumes that,  
413 during the birth and death of virus particles within hosts, gene frequencies do not drift. This is  
414 often an implicit assumption in the literature, for example when changes in genetic diversity be-  
415 tween transmission events are used to estimate infectious doses [41] or transmission bottleneck  
416 sizes [42, 43].

417 Second, we additionally eliminated the genetic drift caused by transmission bottlenecks, by  
418 assuming that the ratio of virus strains released at death is identical to the ratio of virus strains  
419 found in the cadaver that caused exposure. This latter model therefore assumes that the fre-  
420 quency of different virus strains are unchanged by either transmission bottlenecks or replicative  
421 drift, which is an implicit assumption whenever deterministic models are used to describe pat-  
422 terns of diversity [44]. Note that it is not possible to construct a model with replicative drift but  
423 without a transmission bottleneck, because replicative drift requires virus population sizes to be  
424 integer values, and forcing the virus population to have an integer value necessarily imposes a  
425 form of bottleneck.

426 Third, we added purifying selection into the model that lacked both transmission bottlenecks  
427 and replicative drift to determine whether non-neutral evolution is a better explanation for our  
428 data than drift. To implement purifying selection, as we described earlier, we added a single  
429 parameter  $\rho$ , which describes the probability that a host will be susceptible to a particular virus  
430 strain. Each host is therefore susceptible to a subset of  $x$  virus strains from the full set of 50  
431 simulated virus strains, where  $x$  is binomial(50,  $\rho$ ). If the cadaver that a host feeds on contains  
432 one or more strains to which the host is susceptible, then the host dies and the virus that it  
433 releases is a composite of the strains to which it was susceptible, with relative frequencies that  
434 match the relative frequencies in the cadaver. The model thus allows for selection within hosts,  
435 but neglects drift within hosts. Coinfections are implemented in the same way for all of our  
436 models.

**Table S3:** Model parameters, descriptions, values, units, and sources.

| Parameter                | Parameter description                        | Value                           | Units               | Source                |
|--------------------------|----------------------------------------------|---------------------------------|---------------------|-----------------------|
| <b>Within host</b>       |                                              |                                 |                     |                       |
| $\beta$                  | Immune cell attack rate                      | $4.70 \times 10^{-6}$           | per virion per hour | [18]                  |
| $r$                      | Virus replication rate                       | 0.21                            | per hour            | [18]                  |
| $c_1$                    | Bottleneck parameter 1                       | 42.7                            | virions             | [18]                  |
| $c_2$                    | Bottleneck parameter 2                       | 1228                            | virions             | [18]                  |
| $m$                      | Initial immune-cell number                   | 40738                           | lymphocytes         | [18]                  |
| $D$                      | Applied dose                                 | 10000                           | virions             | [35]                  |
| $C$                      | Threshold for death                          | $1 \times 10^9$                 | virions             | [21]                  |
| $\bar{x}_0$              | Mean initial virus                           | $\frac{c_1 D}{c_2 + D} = 38.03$ | virions             | Calculated from above |
| <b>Within epizootics</b> |                                              |                                 |                     |                       |
| $V$                      | Squared C.V. of transmission                 | 6.25                            | dimensionless       | [24]                  |
| $\mu$                    | Cadaver decay rate                           | 0.017                           | per hour            | [27]                  |
| $\bar{\nu}$              | Mean transmission rate                       | Varies across years             | per larva per hour  | [24]                  |
| $\rho$                   | Probability of host by strain susceptibility | 0.9 or 1.0                      | per strain          | [40]                  |
| <b>Between years</b>     |                                              |                                 |                     |                       |
| $b$                      | Baseline reproduction                        | 0.2                             |                     | [24]                  |
| $\lambda$                | Fecundity resistance tradeoff                | $1 \times 10^8$                 | larvae hours        | [37]                  |
| $\gamma$                 | Multi-year overwintering                     | 0.2                             | dimensionless       | [24]                  |
| $\phi$                   | Singe-year overwintering                     | 20                              | dimensionless       | [27]                  |

## 438 **D Sensitivity of results to bottleneck size**

439 In the main text, we assumed a mean bottleneck size of 38 virus particles (table S3) based  
440 on previous studies of baculovirus infections in the gypsy moth [18, 35]. When using this  
441 bottleneck size, the model that included transmission bottlenecks but not replicative drift was  
442 unable to explain our data, because virus populations within hosts tended to be too diverse. But  
443 tighter bottlenecks could reduce this diversity, and our estimate of bottleneck size of course has  
444 error associated with it. Here we show that the bottleneck-only model gives a relatively poor fit  
445 to the data even when bottleneck sizes are reduced by almost an order of magnitude.

446 The bottleneck size that we use to test the sensitivity of our model is derived from [42]. In  
447 this study, Zwart et al. infected *Spodoptera exigua* larvae with tagged strains of *Autographica*  
448 *california* multiple nucleopolyhedrovirus. Using a statistical model that related loss of virus  
449 diversity to bottleneck size, Zwart et al. found that the mean bottleneck size was approximately  
450 4.8 virus particles.

451 To test the bottleneck-only model with this narrower bottleneck estimate, we made two  
452 adjustments to our original bottleneck-only model. First, we altered the dose of virus that  
453 hosts consume from 10,000 occlusion bodies to 156 occlusion bodies (see table S3). This  
454 change reduced the average bottleneck size from 38 to 4.8, thereby implementing the Zwart  
455 et al. estimate of the bottleneck. This reduction in dose, however, also caused mortality rates  
456 given exposure to drop from 98% to 34%. This reduction is highly unrealistic given that, in the  
457 Zwart et al. data, the mortality rate given exposure was near 100%, as mortality rates typically  
458 are for baculovirus experiments that use field-relevant virus doses. We therefore also altered  
459 the model to maintain our original rate of mortality given exposure ( $\approx 98\%$ ). To do this, we  
460 identified simulated pathogen trajectories that resulted in host survival, and we replaced them  
461 with new simulated trajectories in which death occurred, as necessary to maintain a recovery  
462 rate of no more than 2%.

463 In Fig S10, we show that the distribution of within host diversity for this model can indeed  
464 explain the data better than our original bottleneck-only model (compare to Fig 3). Even using  
465 this tighter-bottleneck, however, the bottleneck-only model does not explain the data as well  
466 as the full model, which also includes replicative drift, because the tighter-bottleneck model  
467 predicts that more samples will have high nucleotide diversity ( $\approx 0.2$ ) and fewer samples will  
468 have intermediate levels of nucleotide diversity ( $\approx 0.04 - 0.09$ ) than compared to the data. This  
469 lack of fit is reflected in the likelihood estimates (median log likelihood estimates: Original  
470 bottleneck (38) =  $-266.7$ , Zwart et al. bottleneck (4.8) =  $-72.7$ , Full model =  $-63.9$ ). The  
471 likelihood estimates for the Zwart-et-al.-bottleneck-only model over 100 Monte Carlo simula-  
472 tions ranged from  $-75.8$  to  $-70.1$ , and as table S4 shows, this range is not large enough to cast  
473 any doubt on our conclusion that the full model better explains the data.

474 Note that there is a large discrepancy between the Zwart et al. estimate of the bottleneck

475 size and the Kennedy et al. estimate of the bottleneck size, a discrepancy that is larger than  
476 the uncertainty in the estimate from either study. There are two possible explanations for such  
477 a large discrepancy. The first is the obvious difference that the studies used different virus  
478 species and host species, the importance of which is unknown. The second is that the Zwart et  
479 al. estimate is derived from data on loss of virus diversity using a statistical model that assumes  
480 that all lost diversity can be attributed to a transmission bottleneck. Our models demonstrate  
481 that diversity may also be lost due to replicative drift, and so the Zwart et al. estimate may be  
482 overestimating the severity of transmission bottlenecks. The Kennedy et al. estimate is instead  
483 derived from fitting models to data on mortality and time of death [18], and so the estimate is  
484 not confounded by replicative drift. For these reasons, we used the estimate of Kennedy et al. in  
485 the main text. Although unrealistically severe bottlenecks provide an explanation for our data  
486 that is at least not terrible, we argue that a better explanation for the data is that both replicative  
487 drift and transmission bottlenecks shape the diversity of the gypsy moth baculovirus.

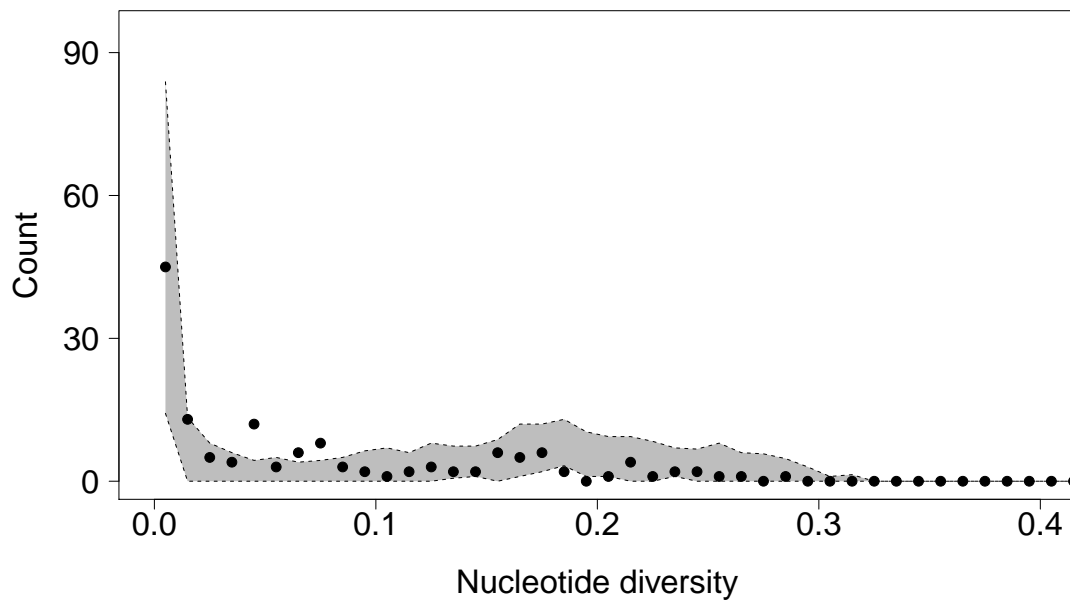

**Figure S10:** Nucleotide diversity predicted by a bottleneck only model that uses the estimate of effective bottleneck size from [42]. This model provides a better explanation for the data than the original bottleneck-only model, but a worse fit to the data than the full model that includes both bottlenecks and replicative drift. We attribute the improvement in performance to the fact that the bottleneck estimate generated by Zwart and colleagues is in reality an estimate of effective bottleneck size, rather than the number of virus particles that initiate infection. It therefore implicitly allows for effects of both transmission bottlenecks and replicative drift, without explicitly describing either. Values underlying data points are provided in S1 Data.

## 489 **E Model of *de novo* mutation**

490 A possible alternative explanation for our data is that diversity within hosts arose through  
491 the accumulation of mutations during pathogen replication within hosts. This seems unlikely  
492 given both that double stranded DNA viruses have low mutation rates and that variation is  
493 concentrated at a small number of loci, but to be thorough, we consider whether a model of *de*  
494 *novo* mutation can explain our data.

495 The mutation model follows a branching process with finite alleles and finite sites. We  
496 assume that each infection begins as a single virus particle. Each virus particle then doubles  
497 each virus generation, until the total virus population size reaches size  $C$ , and host death occurs.  
498 During each doubling, new mutations occur at rate  $M$  per locus. To be consistent with our data,  
499 we assume that there are 712 loci. Note that this is equivalent to having a larger genome in  
500 which strong purifying selection only allows variants to persist at a pre-specified 712 sites.  
501 Mutations are assumed to be selectively neutral, but only two alleles exist for any locus. If a  
502 second mutation occurs at a site that has already mutated, this mutation is a reversion back to  
503 the original allele. If the total number of mutations at a locus is an odd number, the virus thus  
504 has a mutant allele, and if the total number of mutations is an even number, the virus has the  
505 founder allele. This assumption has no qualitative effect on our results.

506 For each model simulation, we calculated the mean nucleotide diversity of the virus pop-  
507 ulation within each host. These values were then compared to the mean nucleotide diversity  
508 in the sequence data, as with our other models. This model does not include replicative drift,  
509 concurrent transmission of multiple strains, or reinfection, and therefore it attempts to explain  
510 within host diversity through mutation alone. A lack of fit to the data would therefore suggest  
511 that one or more of these missing mechanisms are necessary to explain pathogen diversity in  
512 our data.

513 Due to computational constraints on memory and time, we were only able to simulate 15  
514 rounds of virus replication. We assumed that host death occurs after round 15, which corre-  
515 sponds to a virus population size at host death  $C = 32768$  (half of the 30 rounds of doubling  
516 necessary for 1 founder to achieve a population size exceeding  $10^9$ ). To confirm that our con-  
517 clusions were not influenced by the number of rounds of replication, we additionally simulated  
518 the model assuming death after 5 and 10 rounds, but these changes had no qualitative impact  
519 on our conclusions. We simulated the model using mutation rate  $M = 10^{-7}$ , which is the best  
520 estimate of the per nucleotide mutation rate for double-stranded DNA viruses [22]. Because  
521 we saw very little virus diversity within any hosts when using this parameter value, we reran  
522 our simulations using mutation rates of  $10^{-1}$ ,  $10^{-2}$ , and  $10^{-3}$ . These higher mutation rates gen-  
523 erated substantial diversity within hosts, but all hosts were infected with highly diverse virus  
524 populations (Fig S11). As a result, none of these parameter sets were able to reproduce the  
525 variation in diversity in the data, with some hosts being infected by virus populations of high

526 diversity and other hosts infected by virus populations with low diversity. In this model, all  
527 hosts had similar levels of nucleotide diversity. The model is therefore unable to explain our  
528 data, and so we conclude that *de novo* mutation is an unlikely explanation for the data.



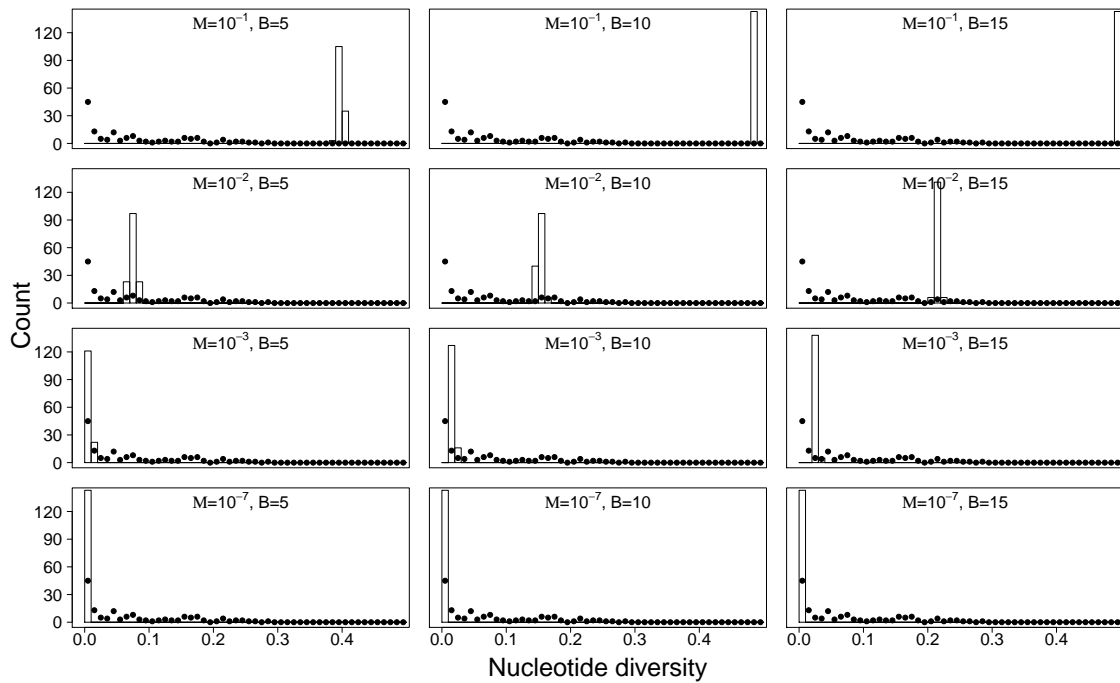

**Figure S11:** The distribution of nucleotide diversity. Points show the data, and bars show the predictions generated by a model of *de novo* mutation. Each row uses a different mutation rate  $M$ , and each column uses a different number of replication rounds  $B$ . Note that very little diversity is generated at realistic mutation rates (i.e. bottom row). Even when mutation rates are high, the model is unable to explain the distribution of diversity seen in the data, because the model predicts that hosts will have very little variation in their nucleotide diversity relative to that seen in our data. Values underlying data points are provided in S1 Data.

## 529 **F Likelihood Calculations**

530 To calculate a likelihood score for each model, we compared the prediction of nucleotide diver-  
531 sity within hosts from each model to the distribution of nucleotide diversity in the data. Each  
532 realization of each model produces a matrix representing the frequency of each of 50 pathogen  
533 strains in each of 2000 randomly-selected hosts killed by the pathogen in the final year of the  
534 model realization. The cells of this matrix thus store the fraction of a simulated cadaver that is  
535 made up of a particular virus strain.

536 To compare the model predictions to the sequence data, we first assigned genotypes to each  
537 of the virus strains. In our sequence data there were 712 sites with allele frequencies between  
538 0.05 and 0.95, and so we generated 712 segregating sites from the model output. To do this,  
539 we constructed pathogen strains one segregating site at a time, by selecting a uniform random  
540 variate between 0.05 and 0.95, and assigning genotype “0” to that fraction of the pathogen  
541 strains, and genotype “1” to all other strains. Strains were thus assigned randomly to each group.  
542 We repeated this process until we had constructed genotypes composed of 712 segregating sites.

543 A common approach when working with this type of data is to calculate a composite like-  
544 lihood, sometimes referred to as a psuedo-likelihood [45]. A composite likelihood is the likeli-  
545 hood that results when partial likelihoods are calculated for subsets of a large dataset, and then  
546 the components of the likelihood are combined. In the population genetics literature, compos-  
547 ite likelihoods often arise when partial likelihoods are calculated at each locus independently  
548 and then combined into a single value (for example, [46]). This calculation would match the  
549 true likelihood if all loci were unlinked and thus independent, but if loci are linked and thus  
550 not independent, there can be a large difference between the composite likelihood and the true  
551 likelihood, potentially leading to incorrect inferences. We avoided this problem by calculating  
552 likelihood estimates based on a summary statistic, the nucleotide diversity, instead of calculat-  
553 ing likelihoods at individual loci (in Supplemental Information I, we show that our conclusions  
554 hold for other summary statistics). Our summary statistic covers the full set of data that we an-  
555 alyzed, and so our approach avoids the problem with pseudo-replication that can arise when the  
556 assumption of independence between loci is violated. By using a summary statistic to describe  
557 complex data, we may have sacrificed statistical power, but the differences in log likelihood  
558 between our models were on the order of 200 log units, and so statistical power was not an  
559 issue.

560 To calculate likelihoods, we randomly selected 1000 infected hosts from our model output,  
561 and we calculated the nucleotide diversity of each simulated host using the simulated virus hap-  
562 lotypes described above. We used these simulated data to estimate the likelihood of observing  
563 the actual data for any particular model realization. In practice, we first recorded the number  
564 of cadavers whose nucleotide diversity fell in each of 50 bins ranging in value from 0 to 0.5 by  
565 increments of 0.01. Doubling or halving the bin widths had no impact on our conclusions. We  
566 used these numbers to estimate the probability that the nucleotide diversity of any particular ca-  
567 daver from our sequence data would fall in any particular bin. To avoid probability values of 0  
568 that result from using a finite number of simulated hosts, we slightly adjusted the probability of

569 each bin by adding 1 to each bin before dividing by the number of simulated hosts (1000) plus  
 570 the number of bins (50). This is a conservative approach in that it slightly improves the likeli-  
 571 hood of poorly fitting models relative to better fitting models. We used these probability values  
 572 in a multinomial distribution using “`dmultinom`” in R, to generate a Monte Carlo estimate of  
 573 the likelihood for each realization of each model.

574 Following [47], we averaged likelihood estimates across realizations. The computational  
 575 constraints of simulating the models were quite severe, but likelihood differences between mod-  
 576 els were large enough that 69 realizations (68 realizations for the purifying selection model)  
 577 were sufficient to establish that the best model is vastly better than the alternative models. Al-  
 578 though our likelihood estimates depend on the random assignment of genotypes and simulated  
 579 infected hosts, in practice the variation across realizations of the genotype assignment process  
 580 was very small compared to the difference in mean likelihoods between models, and so this  
 581 variation had no effect on our results. To show this, we repeated the genotype assignment pro-  
 582 cess 100 times, re-calculating the likelihood each time. As table S4 illustrates, the ordering of  
 583 the models would be the same even if we had only the worst likelihood for the best model, and  
 584 the best likelihoods for the other models.

**Table S4:** Minimum, median, and maximum log-likelihood estimates for each of our models, across 100 realizations of the genotype-assignment process used in our likelihood calculations.

| <b>Model</b>                      | <b>Minimum</b> | <b>Median</b> | <b>Maximum</b> |
|-----------------------------------|----------------|---------------|----------------|
| Purifying selection               | -364.6         | -353.1        | -338.3         |
| Bottlenecks only                  | -274.9         | -266.7        | -248.5         |
| Bottlenecks and replicative drift | -66.0          | -63.9         | -61.6          |
| Neither bottlenecks nor drift     | -508.3         | -503.2        | -498.5         |

585

## 586 **G Effects of varying the strength of selection in the purifying** 587 **selection model**

588 In our selection model, the probability of a particular host being susceptible to a particular  
589 virus strain is equal to the parameter  $\rho$ . This value is based on a previous bioassay experiment  
590 [40], in which  $97\% + / - 3\%$  of hosts died from exposure to a plaque purified virus strain when  
591 fed a realistic dose on a leaf disk, a typical result in this system [26]. Because setting  $\rho = 1.0$   
592 recreates a neutral model, and because the impact of selection increases as  $\rho$  is reduced, we  
593 used  $\rho = 0.9$  in our simulations of the selection model. This value is two standard errors less  
594 than its best estimate [40].

595 In Fig 3 and table S4, we show that a purifying selection model using this parameter value  
596 provides an extremely poor fit to the data. Here we test whether other values of  $\rho$  can explain  
597 our data. We reran our selection model using  $\rho = 0.8$ ,  $\rho = 0.7$ , and  $\rho = 0.6$ . The fit improves  
598 as we lower  $\rho$ , but to achieve a likelihood score and model fit that is almost as good as our best  
599 model requires that we use the very unrealistic value  $\rho = 0.6$ , which is about 12 standard errors  
600 smaller than the best estimate of this parameter (Fig S12 and table S5).

601 To illustrate how unrealistic this parameter value is, we consider our model in a Bayesian  
602 framework, in which the posterior probability of  $\rho$  is discounted by its prior probability. If the  
603 prior for  $\rho$  is based on its empirical estimate from [40], then at  $\rho = 0.6$ , the prior density is  
604 approximately 70 log units smaller than at  $\rho = 0.90$ , and 72 log units smaller than at  $\rho = 1.0$ .  
605 The effective value of  $\rho$  is 1.0 in our drift-only models, because all larvae are susceptible to all  
606 virus strains. The likelihood of the selection model at  $\rho = 0.6$  should therefore be discounted  
607 by approximately 72 log units when compared to the likelihood of our neutral models. We  
608 therefore conclude that neutral evolution is a better explanation for our data than selection.

**Table S5:** Minimum, median, and maximum log-likelihood estimates for selection models using smaller values for host by virus strain susceptibility  $\rho$ . As in table S4, these likelihood estimates were generated using 100 realizations of the genotype-assignment processes.

| <b>Model</b> | <b>Minimum</b> | <b>Median</b> | <b>Maximum</b> |
|--------------|----------------|---------------|----------------|
| $\rho = 0.8$ | -219.7         | -209.8        | -201.1         |
| $\rho = 0.7$ | -104.8         | -100.8        | -92.0          |
| $\rho = 0.6$ | -68.4          | -66.0         | -63.1          |

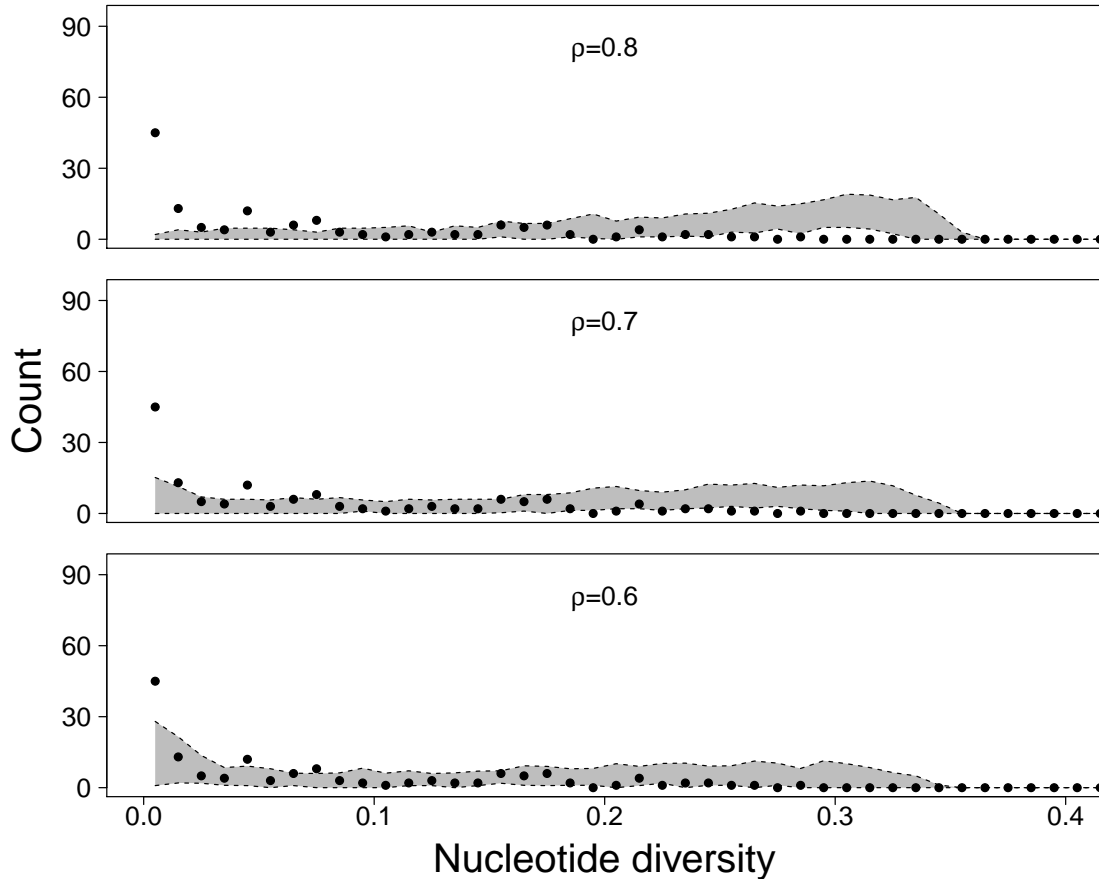

**Figure S12:** Plots of nucleotide diversity. As in Fig 3, the grey interval shows 95% confidence intervals of model simulations and black points show the results from our sequence data. The three figures from top to bottom present the results from models using different estimates of host by virus strain susceptibility  $\rho = 0.8$ ,  $\rho = 0.7$ , and  $\rho = 0.6$ . The current best empirical estimate is  $\rho = 0.97$ . In the main text, we showed that when  $\rho = 0.9$ , the model predicted levels of diversity within hosts that were too high, and here we show the sensitivity of our conclusion to the value of  $\rho$ . The selection model consistently predicts levels of nucleotide diversity within hosts that are too high even for values of  $\rho$  that are unrealistically small (i.e. up to 12 standard errors from its best estimate). Values underlying data points are provided in S1 Data.

## 610 **H Testing for evidence of selection within hosts**

611 As we have shown, our simple purifying selection model is a poor explanation for the data,  
612 but we have not ruled out that more complex models of selection might perform better. Here,  
613 we use a method similar to the McDonald-Kreitman test [48] to determine whether there is  
614 evidence that selection shapes pathogen diversity within hosts.

615 Like the McDonald-Kreitman test, our method compares the relative representation of syn-  
616 onymous and non-synonymous variation at loci that are segregating or not segregating within  
617 a population (in our case, “population” refers to the virus population within a host). Assuming  
618 that selection disproportionately affects loci with non-synonymous variants, directional selec-  
619 tion should cause non-synonymous alleles to fix within a population faster than synonymous al-  
620 leles. Frequency dependent selection, which might result for example from immune-mediated  
621 diversifying selection, should alternatively prevent non-synonymous alleles from fixing in a  
622 population. We can therefore test whether selection is acting within hosts by examining whether  
623 loci with non-synonymous variants segregate at higher or lower rates within hosts relative to loci  
624 with synonymous variants than would be expected by chance. Note, however, that linkage may  
625 limit the ability of selection to act independently on synonymous and non-synonymous muta-  
626 tions, and so this test is imperfect. Strong signals of selection may nevertheless emerge if they  
627 are present.

628 To implement this test, we needed to identify which of our 712 segregating sites could  
629 be classified as “synonymous” or “non-synonymous”. First, we removed all of the sites with  
630 indels or with more than two alleles. We then constructed a custom database for “snpEff”  
631 [49] using the gypsy moth baculovirus whole genome sequence on GenBank [6], and we ran  
632 “snpEff” to determine which of the remaining sites contained synonymous or nonsynonymous  
633 coding variants. Variants in non-coding parts of the genome were ignored, leaving us with 289  
634 synonymous sites and 251 non-synonymous sites.

635 If selection were not acting on the variants within hosts, we would expect the ratio of syn-  
636 onymous to non-synonymous sites within hosts to have a ratio that is not statistically different  
637 from 289:251 both for sites segregating within a host and for sites fixed within a host. We de-  
638 fined segregating sites as sites where both alleles occurred at frequency greater than 0.025, and  
639 non-segregating sites as sites where this was not true. We then tested for selection by perform-  
640 ing a series of Fisher exact tests implemented using the function “fisher.test” in “R” [50]. One  
641 test was performed for each sample resulting in 143 test statistics.

642 After Bonferroni correction [51], none of the 143 tests were statistically significant. Without  
643 correcting for multiple testing, 9 of 143 tests yielded p-values less than 0.05, which is close to  
644 the null expectation of 7.15. We therefore conclude that there is no evidence of selection acting  
645 within hosts.

## I Alternative summary statistics

In the main text, we compared model predictions to sequence data using mean nucleotide diversity  $\pi$ . Here we show that using the effective number of alleles  $A_e$ , the proportion of polymorphic loci  $P$ , or a metric that we refer to as relative nucleotide diversity  $\hat{\pi}$  yields the same conclusions as we found using nucleotide diversity.

The effective number of alleles  $A_e$  is the number of alleles that would be required to explain a given level of genetic diversity, assuming that the alleles occur at equal frequency. In a population with very low genetic diversity, the effective number of alleles would be close to one, and it would increase as the genetic diversity in the population increases. We calculated the mean effective number of alleles in each of our samples using the following formula.

$$A_e = \frac{1}{n} \sum_{j=1}^n \left( \frac{1}{\sum_{i=1}^{k_j} x_{ij}^2} \right). \quad (19)$$

Here  $n$  is the number of loci,  $k_j$  is the number of alleles at locus  $j$ , and  $x_{ij}$  is the frequency of allele  $i$  at locus  $j$ .

We also used the proportion of polymorphic sites  $P$ , which is the fraction of sites that are segregating within a population. Here we consider a site to be segregating within a sample if the frequency of the major allele was less than 0.99.

Lastly, to quantify the diversity present at the within-host scale relative to the diversity present at the between-host scale, we use a summary statistic  $\hat{\pi}$ , or relative nucleotide diversity. This statistic describes the level of nucleotide diversity present within hosts relative to the level of nucleotide diversity present across consensus sequences across hosts, and it is calculated by dividing observed nucleotide diversity within hosts by observed nucleotide diversity across consensus sequences. Note that this value cannot be negative, but is otherwise unbounded, because high levels of coinfection can generate high nucleotide diversity within hosts but low levels of nucleotide diversity between consensus genome sequences.

For all three summary statistics, we restricted our analysis to the 712 sites previously identified as segregating at the population level. We analyzed these data identically to the nucleotide diversity data, with two modifications. First, the plausible range of these summary statistics differed from nucleotide diversity, and so in our calculation of the likelihood, we altered the bins so that instead of ranging from 0 to 0.5, they ranged from 1 to 1.7 for the effective number of alleles  $A_e$ , from 0 to 1 for the proportion of polymorphic sites  $P$ , and from 0 to 15 for relative nucleotide diversity  $\hat{\pi}$ . The width of each bin was modified to maintain 50 total bins. Second, to save computational time, the likelihood was estimated over 10 realizations of the genotype-assignment process instead of the 100 realizations that we used for nucleotide diversity. The differences in likelihood estimates between models are nevertheless clear.

The likelihood estimates that arise when using different summary statistics are presented in separate tables, because the different summary statistics arise from different data and therefore cannot be directly compared to each other. Nevertheless, these three new tables show the

683 same qualitative results as table S4; the model that includes both transmission bottlenecks and  
 684 replicative drift is our best model (tables S6-S8 and figs. S13-S15).

**Table S6:** Minimum, median, and maximum log-likelihood estimates for models when the test statistic is the effective alleles  $A_e$ .

| <b>Model (Summary statistic <math>A_e</math>)</b> | <b>Minimum</b> | <b>Median</b> | <b>Maximum</b> |
|---------------------------------------------------|----------------|---------------|----------------|
| Neither bottlenecks nor drift                     | -502.4         | -498.5        | -495.4         |
| Bottlenecks only                                  | -271.3         | -265.0        | -260.8         |
| Bottlenecks and replicative drift                 | -81.2          | -79.6         | -77.3          |
| Purifying selection                               | -361.6         | -351.8        | -347.9         |

**Table S7:** Minimum, median, and maximum log-likelihood estimates for models when the test statistic is the proportion of polymorphic sites  $P$ .

| <b>Model (Summary statistic <math>P</math>)</b> | <b>Minimum</b> | <b>Median</b> | <b>Maximum</b> |
|-------------------------------------------------|----------------|---------------|----------------|
| Neither bottlenecks nor drift                   | -522.9         | -514.1        | -511.1         |
| Bottlenecks only                                | -318.7         | -305.8        | -298.8         |
| Bottlenecks and replicative drift               | -121.1         | -117.0        | -113.4         |
| Purifying selection                             | -447.1         | -416.9        | -412.1         |

**Table S8:** Minimum, median, and maximum log-likelihood estimates for models when the test statistic is the relative nucleotide diversity  $\hat{\pi}$ .

| <b>Model (Summary statistic <math>\hat{\pi}</math>)</b> | <b>Minimum</b> | <b>Median</b> | <b>Maximum</b> |
|---------------------------------------------------------|----------------|---------------|----------------|
| Neither bottlenecks nor drift                           | -592.4         | -591.5        | -589.6         |
| Bottlenecks only                                        | -316.0         | -312.5        | -309.1         |
| Bottlenecks and replicative drift                       | -13.3          | -13.2         | -13.1          |
| Purifying selection                                     | -347.7         | -346.8        | -344.8         |



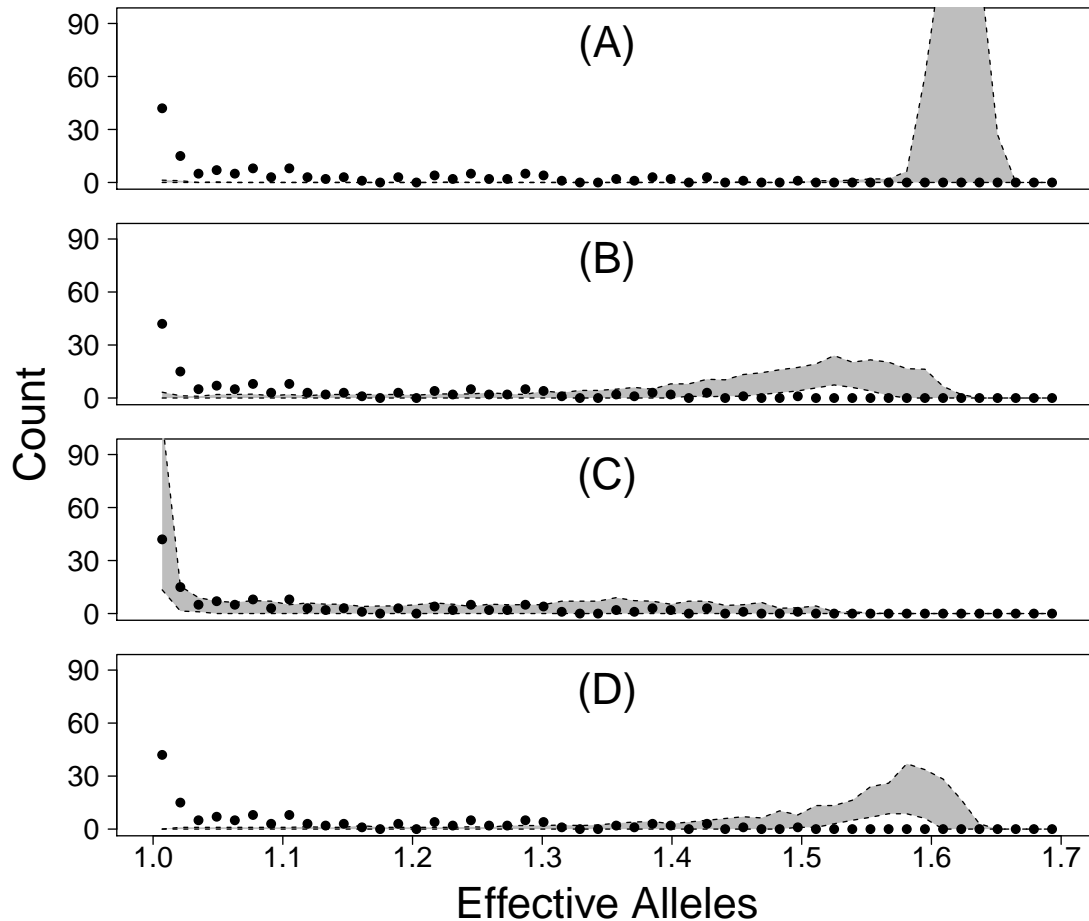

**Figure S13:** Fit of model predictions to data when using effective alleles  $A_e$  instead of nucleotide diversity  $\pi$ . As in Fig 3, grey shading shows 95% prediction envelopes of the model and points represent measures from the sequence data. (A) shows the model that includes neither transmission bottlenecks nor replicative drift, (B) shows the model that includes transmission bottlenecks but lacks replicative drift, (C) shows the model that includes both transmission bottlenecks and replicative drift, and (D) shows the model that includes purifying selection but lacks transmission bottlenecks and replicative drift. The model in panel (C) clearly fits the data best. Values underlying data points are provided in S9 Data.

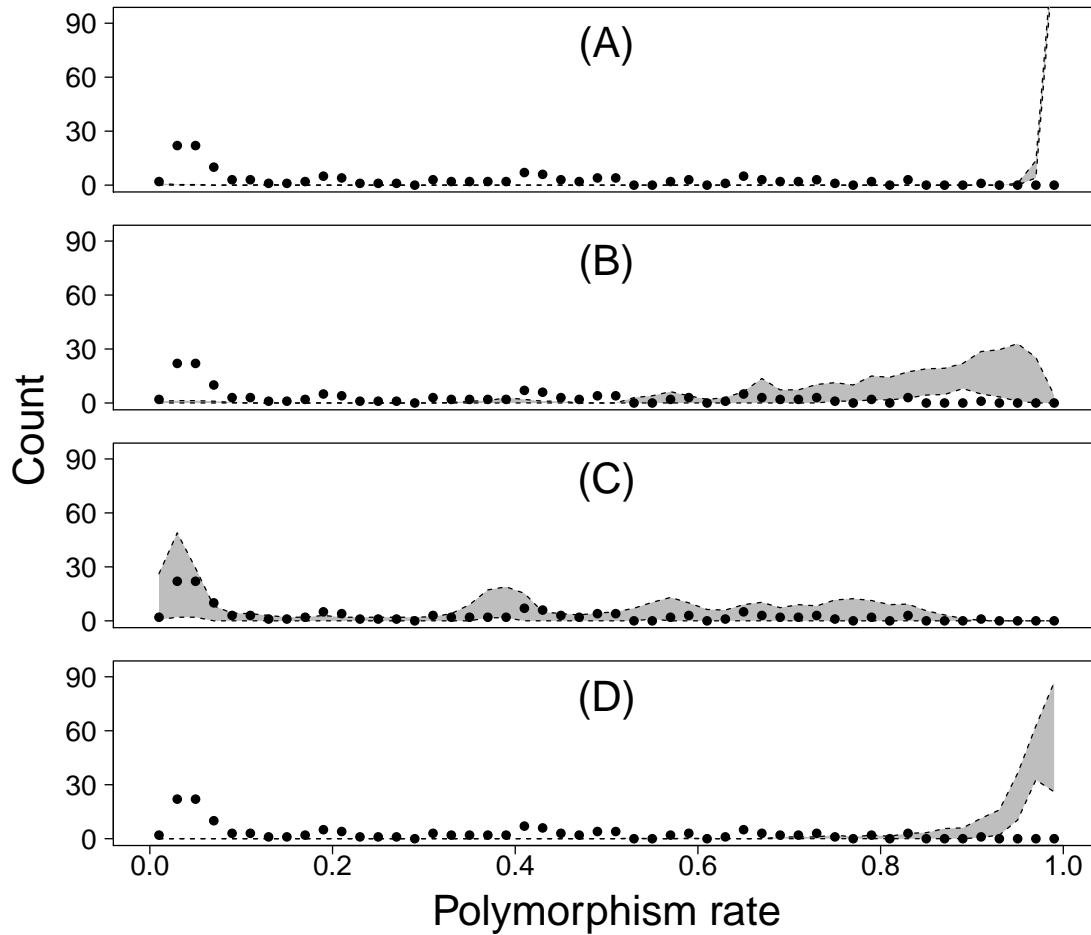

**Figure S14:** Fit of model predictions to data when using the proportion of polymorphic sites  $P$ , formatted as in Fig S13. The model that includes both transmission bottlenecks and replicative drift (panel C) again provides by far the best fit to the data. Values underlying data points are provided in S10 Data.

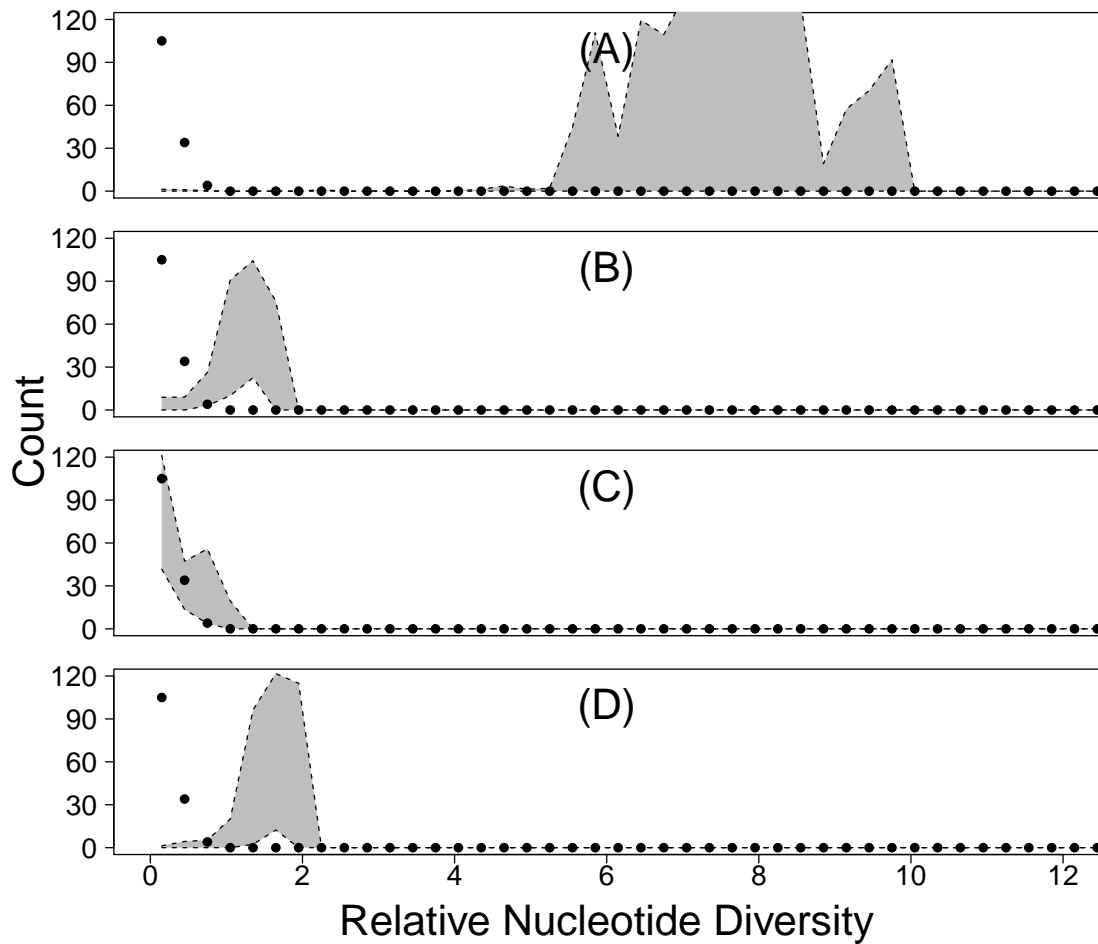

**Figure S15:** Fit of model predictions to data when using the relative nucleotide diversity  $\hat{\pi}$ , formatted as in Fig S13. Panel C again provides the best fit to the data. Values underlying data points are provided in S11 Data.

## 685 **J Mapping error**

686 In Fig 4 in the main text, the distributions of allele frequencies in the data differ from those  
687 predicted by the best model in two ways. First, the tails in the data histograms tend to be longer  
688 than the tails in the model histograms. Second, the peaks around intermediate frequency alleles  
689 in the data histograms are much broader than the peaks in the model histograms. Here we show  
690 that both of these features can be explained by biases introduced during the mapping of short  
691 reads to a reference genome.

692 We begin by showing the effect of mapping biases on the distribution of allele frequencies  
693 in a host infected by a single pathogen genotype. This required a three-step process. First, we  
694 created a synthetic pathogen genotype, by combining the reference genome [6] with the allelic  
695 variants that we detected in our sequence data. In practice, we used a probability of 0.5 that  
696 any particular allele would match the alternative sequence rather than the reference. Second,  
697 using this synthetic genotype, we simulated Illumina sequencing by generating  $5 \times 10^5$  short  
698 sequence reads, each 100 bp long, from the generated pathogen genotype, while including a  
699 2% sequencing error rate. Third, we mapped the synthetic Illumina-like sequence reads back  
700 to the reference genome in the same way that we mapped the real sequence data. The results  
701 show that, if sequencing error is sufficiently high, then a frequency histogram with a peak at  
702 allele frequencies of less than 1 can be generated even when the host is infected by only a single  
703 pathogen strain (Fig S16).

704 Next, we showed that the spread around peaks at intermediate frequencies in histograms of  
705 allele frequencies is partly due to mapping errors. To do this, we used a very similar protocol  
706 to the one we just described, except that in this case, rather than generating a single pathogen  
707 strain, we generated three synthetic strains. For these three synthetic strains, we assumed a  
708 probability of 0.1 that any particular allele would match the alternative sequence rather than  
709 the reference. The host was then assumed to be co-infected by these three pathogens at a  
710 ratio of 4:3:3. The results show that the errors introduced during mapping lead to erroneously  
711 broad peaks, instead of the tight clusters of intermediate frequency alleles that we would expect  
712 in the absence of errors. Allowing for mapping error in this way yields histograms of allele  
713 frequencies that closely match the data histograms (compare Fig S17 to Fig 4 in the main text).

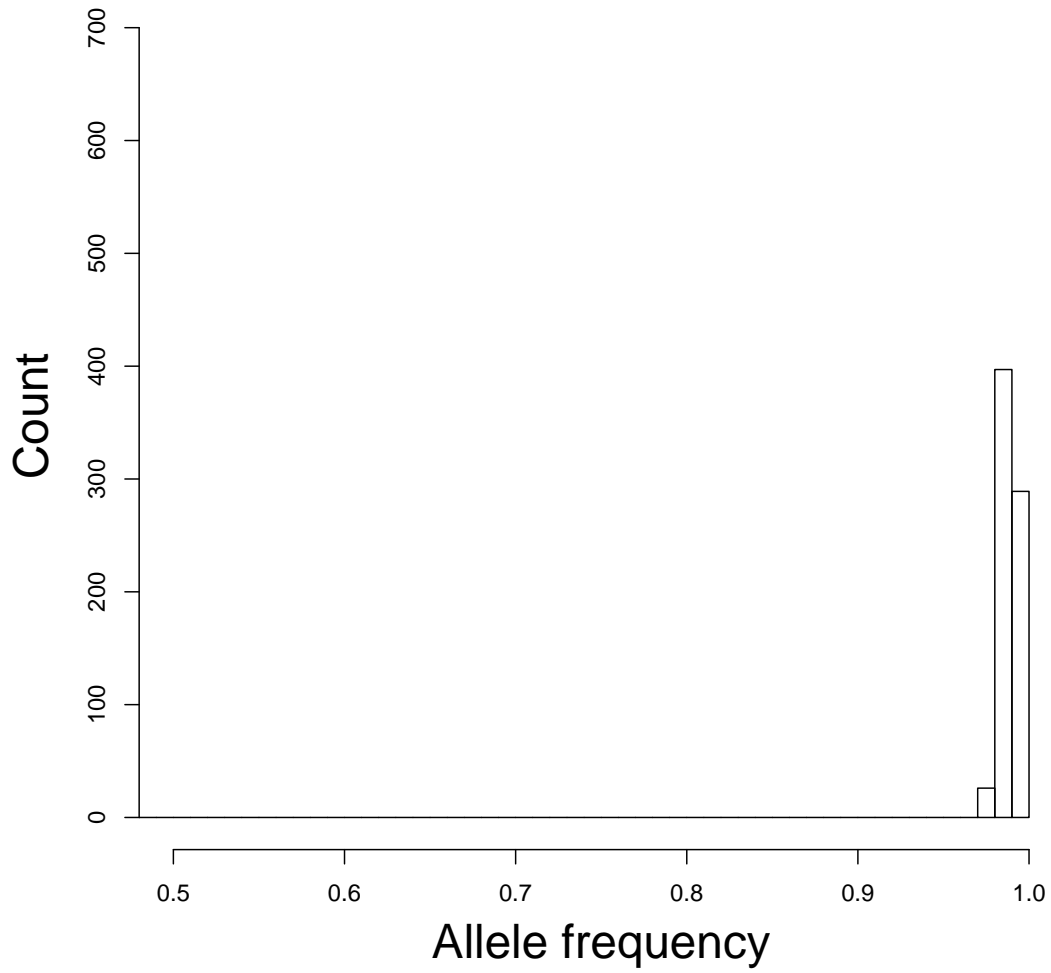

**Figure S16:** Histogram of synthetic sequence data from a single-infected host, as produced by our model with the inclusion of mapping errors. Values underlying histogram are provided in S12 Data.

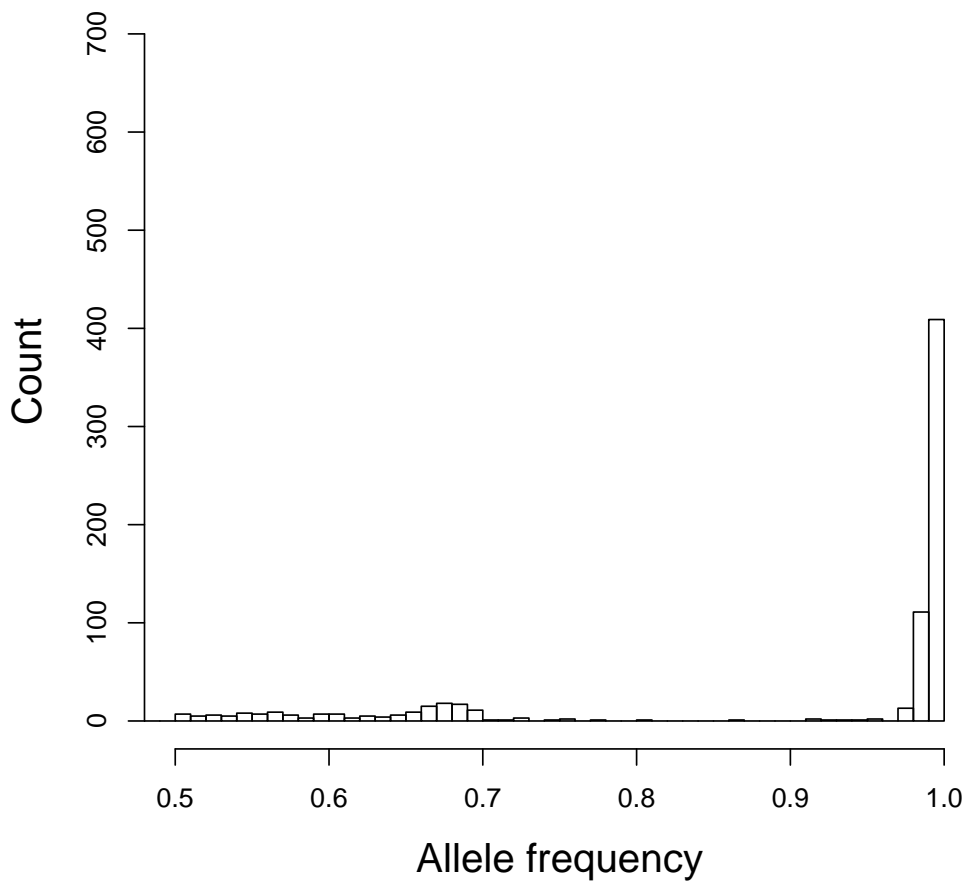

**Figure S17:** Histogram of synthetic sequence data from a co-infected host, as produced by our model with the inclusion of mapping error. Values underlying histogram are provided in S13 Data.

## 714 **References and Notes**

- 715 [1] Bell RA, Owens CD, Shapiro M, Tardif JR. Mass rearing and virus production. In: Doane  
716 CC, McManus ML, editors. *The Gypsy Moth: Integrated Pest Management*. Washington,  
717 DC: USDA Technical Bulletin; 1981. p. 599–655.
- 718 [2] Rohrmann GF. *Baculovirus Molecular Biology*. Bethesda: National Library of Medicine  
719 (US); 2008.
- 720 [3] Christian PD, Gibb N, Kasprzak AB, Richards A. A rapid method for the identification  
721 and differentiation of *Helicoverpa* nucleopolyhedroviruses (NPV *Baculoviridae*) isolated  
722 from the environment. *J Virol Methods*. 2001;96(1):51–65.
- 723 [4] Sambrook J, Fritsch EF, Maniatis T. *Molecular Cloning: A Laboratory Manual*. New  
724 York: Cold Spring Harbor Laboratory Press; 1989.
- 725 [5] Meyer M, Kircher M. Illumina sequencing library preparation for highly multiplexed  
726 target capture and sequencing. *Cold Spring Harb Protoc*. 2010;2010(6):1–10.
- 727 [6] Kuzio J, Pearson MN, Harwood SH, Funk CJ, Evans JT, Slavicek JM, et al. Sequence  
728 and analysis of the genome of a baculovirus pathogenic for *Lymantria dispar*. *Virology*.  
729 1999;253:17–34.
- 730 [7] Langmead B, Salzberg SL. Fast gapped-read alignment with Bowtie 2. *Nat Methods*.  
731 2012;9(4):357–359.
- 732 [8] Li H, Handsaker B, Wysoker A, Fennell T, Ruan J, Homer N, et al. The sequence align-  
733 ment/map format and SAMtools. *Bioinformatics*. 2009;25(16):2078–2079.
- 734 [9] Li H. A statistical framework for SNP calling, mutation discovery, association mapping  
735 and population genetical parameter estimation from sequencing data. *Bioinformatics*.  
736 2011;27(21):2987–2993.
- 737 [10] Koboldt DC, Zhang Q, Larson DE, Shen D, McLellan MD, Lin L, et al. VarScan 2:  
738 somatic mutation and copy number alteration discovery in cancer by exome sequencing.  
739 *Genome Res*. 2012;22(3):568–576.
- 740 [11] Langmead B, Trapnell C, Pop M, Salzberg SL. Ultrafast and memory-efficient alignment  
741 of short DNA sequences to the human genome. *Genome Biol*. 2009;10(3):R25.
- 742 [12] Fujita PA. Combining models with empirical data to examine dispersal mechanisms in the  
743 gypsy moth nucleopolyhedrosis host-pathogen system [Ph.D. Dissertation]. University of  
744 Chicago; 2007.
- 745 [13] Nei M, Li WH. Mathematical model for studying genetic variation in terms of restriction  
746 endonucleases. *Proc Natl Acad Sci USA*. 1979;76(10):5269–5273.

- 747 [14] Kot M. Elements of Mathematical Ecology. Cambridge: Cambridge University Press;  
748 2001.
- 749 [15] Renshaw E. Modeling Biological Populations in Space and Time. Cambridge: Cambridge  
750 University Press; 1991.
- 751 [16] Saaty TL. Some stochastic-processes with absorbing barriers. J R Stat Soc Series B Stat  
752 Methodol. 1961;23:319–334.
- 753 [17] Kennedy DA, Dukic V, Dwyer G. Pathogen growth in insect hosts: inferring the impor-  
754 tance of different mechanisms using stochastic models and response-time data. Am Nat.  
755 2014;184(3):407–423.
- 756 [18] Kennedy DA, Dukic V, Dwyer G. Combining principal component analysis with param-  
757 eter line-searches to improve the efficacy of Metropolis–Hastings MCMC. Environ Ecol  
758 Stat. 2015;22(2):247–274.
- 759 [19] Ashida, Brey PT. In: Brey PT, Hultmark D, editors. Molecular Mechanisms of Immune  
760 Responses in Insects. London: Chapman & Hall; 1998.
- 761 [20] Trudeau D, Washburn JO, Volkman LE. Central role of hemocytes in *Autographa californica*  
762 *M* nucleopolyhedrovirus pathogenesis in *Heliothis virescens* and *Helicoverpa zea*. J  
763 Virol. 2001;75(2):996–1003.
- 764 [21] Shapiro M, Robertson JL, Bell RA. Quantitative and qualitative differences in gypsy moth  
765 (Lepidoptera: Lymantriidae) nucleopolyhedrosis virus produced in different-aged larvae.  
766 Journal of Economic Entomology. 1986;79:1174–1177.
- 767 [22] Sanjuán R, Domingo-Calap P. Mechanisms of viral mutation. Cell Mol Life Sci.  
768 2016;73(23):4433–4448.
- 769 [23] Dwyer G, Elkinton JS, Buonaccorsi JP. Host heterogeneity in susceptibility and disease  
770 dynamics: Tests of a mathematical model. Am Nat. 1997;150(6):685–707.
- 771 [24] Elderd BD, Dushoff J, Dwyer G. Host-Pathogen Interactions, Insect Outbreaks, and Nat-  
772 ural Selection for Disease Resistance. Am Nat. 2008;172:829–842.
- 773 [25] Keeling MJ, Rohani P. Modeling Infectious Diseases. New Jersey: Princeton University  
774 Press; 2008.
- 775 [26] Dwyer G, Firestone J, Stevens TE. Should models of disease dynamics in herbivo-  
776 rous insects include the effects of variability in host-plant foliage quality? Am Nat.  
777 2005;165(1):16–31.



- 778 [27] Fuller E, Elderd BD, Dwyer G. Pathogen persistence in the environment and insect-  
779 baculovirus interactions: disease-density thresholds, epidemic burnout and insect out-  
780 breaks. *Am Nat.* 2012;179(3).
- 781 [28] Elderd BD. Developing models of disease transmission: insights from ecological studies  
782 of insects and their baculoviruses. *PLoS Pathog.* 2013;9(6):e1003372.
- 783 [29] Dwyer G, Dushoff J, Elkinton JS, Levin SA. Pathogen-driven outbreaks in forest defolia-  
784 tors revisited: Building models from experimental data. *Am Nat.* 2000;156(2):105–120.
- 785 [30] Bratsun D, Volfson D, Tsimring LS, Hasty J. Delay-induced stochastic oscillations in gene  
786 regulation. *P Natl Acad Sci USA.* 2005;102(41):14593–14598.
- 787 [31] Hunter AF. Traits that distinguish outbreaking and nonoutbreaking macrolepidoptera feed-  
788 ing on northern hardwood trees. *Oikos.* 1991;60:275–282.
- 789 [32] Páez D, Fleming-Davies A, Dwyer G. Effects of pathogen exposure on life-history varia-  
790 tion in the gypsy moth (*Lymantria dispar*). *J Evolution Biol.* 2015;28(10):1828–1839.
- 791 [33] Páez DJ, Dukic V, Dushoff J, Fleming-Davies A, Dwyer G. Eco-evolutionary theory and  
792 insect outbreaks. *Am Nat.* 2017;189(6):616–629.
- 793 [34] Fleming-Davies AE, Dwyer G. Phenotypic Variation in Overwinter Environmental Trans-  
794 mission of a Baculovirus and the Cost of Virulence. *Am Nat.* 2015;186(6):797–806.
- 795 [35] Eakin L, Wang M, Dwyer G. The effects of the avoidance of infectious hosts on infection  
796 risk in an insect-pathogen interaction. *Am Nat.* 2014;185(1):100–112.
- 797 [36] Woods SA, Elkinton JS. Bimodal patterns of mortality from nuclear polyhedrosis-virus in  
798 gypsy-moth (*Lymantria-dispar*) populations. *J Invertebr Pathol.* 1987;50:151–157.
- 799 [37] Dwyer G, Elkinton JS. Host dispersal and the spatial spread of insect pathogens. *Ecology.*  
800 1995;76(4):1262–1275.
- 801 [38] Johnson DM, Liebhold AM, Bjornstad ON, McManus ML. Circumpolar variation in  
802 periodicity and synchrony among gypsy moth populations. *J Anim Ecol.* 2005;74(5):882–  
803 892.
- 804 [39] Elkinton JS, Liebhold AM. Population dynamics of gypsy moth in North America. *Annu*  
805 *Rev Entomol.* 1990;35:571–596.
- 806 [40] Elderd BD, Rehill BJ, Haynes KJ, Dwyer G. Induced plant defenses, host–pathogen inter-  
807 actions, and forest insect outbreaks. *P Natl Acad Sci USA.* 2013;110(37):14978–14983.
- 808 [41] Poon LL, Song T, Rosenfeld R, Lin X, Rogers MB, Zhou B, et al. Quantifying influenza  
809 virus diversity and transmission in humans. *Nat Genet.* 2016;48(2):195–200.

- 810 [42] Zwart MP, Hemerik L, Cory JS, de Visser JAGM, Bianchi FJJA, Van Oers MM, et al. An  
811 experimental test of the independent action hypothesis in virus-insect pathosystems. *Proc*  
812 *R Soc Lond B*. 2009;276(1665):2233–2242.
- 813 [43] Abel S, zur Wiesch PA, Davis BM, Waldor MK. Analysis of bottlenecks in experimental  
814 models of infection. *PLoS Pathog*. 2015;11(6):e1004823.
- 815 [44] Lorenzo-Redondo R, Fryer HR, Bedford T, Kim EY, Archer J, Pond SLK, et al.  
816 Persistent HIV-1 replication maintains the tissue reservoir during therapy. *Nature*.  
817 2016;530(7588):51+. doi:10.1038/nature16933.
- 818 [45] Varin C, Reid N, Firth D. An overview of composite likelihood methods. *Statistica Sinica*.  
819 2011; p. 5–42.
- 820 [46] McVean G, Awadalla P, Fearnhead P. A coalescent-based method for detecting and esti-  
821 mating recombination from gene sequences. *Genetics*. 2002;160(3):1231–1241.
- 822 [47] Berger JO, Liseo B, Wolpert RL, et al. Integrated likelihood methods for eliminating  
823 nuisance parameters. *Stat Sci*. 1999;14(1):1–28.
- 824 [48] McDonald JH, Kreitman M. Adaptive protein evolution at the *Adh* locus in *Drosophila*.  
825 *Nature*. 1991;351(6328):652.
- 826 [49] Cingolani P, Platts A, Coon M, Nguyen T, Wang L, Land SJ, et al. A program for anno-  
827 tating and predicting the effects of single nucleotide polymorphisms, SnpEff: SNPs in the  
828 genome of *Drosophila melanogaster* strain w1118; iso-2; iso-3. *Fly*. 2012;6(2):80–92.
- 829 [50] R Core Team. *R: A Language and Environment for Statistical Computing*; 2012.
- 830 [51] Abdi H. In: Salkind N, editor. *Bonferroni and Šidák corrections for multiple comparisons*.  
831 Sage Thousand Oaks, CA; 2007. p. 103–107.
