# Supplementary material for: Effects of multiple sources of genetic drift on pathogen variation within hosts
Source: PLoS Biol. 2018 Mar 28;16(3):e2004444. doi: 10.1371/journal.pbio.2004444 (PMC5891033; doi:10.1371/journal.pbio.2004444)
Supplement: S5 Data — (CSV) [file pbio.2004444.s006.csv]

Locus	F_ST
535	0.0782036794842404
1179	0.00820786263974788
2214	0.0616104369104566
2220	0.0679892904715397
2288	0.0734407385816718
3859	0.0650169946424842
4300	0.0471434277870169
4318	0.0472699980493338
4476	0.0204322372373631
4477	0.0204322372373631
4793	0.00923513394539807
4812	0.0123198671912745
4890	0.0171379084731078
4895	0.0171379084731078
4899	0.0171379084731078
4909	0.0124475286843609
5285	0.0279228694328939
5330	0.0160422877666631
5499	0.0453571705659771
5513	0.0147101649386449
5657	0.0257202352372527
5891	0.0245156123543082
5974	0.0238835521068634
6266	0.0279507859717292
6267	0.0278236403900382
6279	0.0286354160269887
6406	0.0308667786705094
6908	0.0178223384172806
7347	0.0248506347919722
7447	0.0247010079803884
7502	0.0166083936928821
7503	0.0170936755849924
7528	0.0311836066329655
7569	0.0333828900101502
7573	0.0333828900101502
7647	0.0225931326377555
7716	0.0240521925984162
7935	0.0192572026546237
7937	0.0192572026546237
7945	0.0192572026546237
7974	0.0160169038837685
8323	0.0428774387965453
8324	0.0428774387965453
8402	0.0369093757755607
8476	0.0542549130502737
8477	0.0542549130502737
8613	0.035757658303399
8614	0.0353982994393096
8702	0.0393693663778438
8865	0.0406344853436764
9918	0.0247239498826786
10081	0.0246279549268121
10526	0.0289057775697734
12413	0.0174524299468409
12456	0.0192443747001721
12862	0.0339821382928531
12903	0.0328629889000464
12933	0.0180461126399459
12951	0.0162442342472031
12952	0.0162442342472031
13042	0.039662820948479
13043	0.039662820948479
13044	0.039662820948479
13065	0.0206228836949778
13112	0.0285704393318007
13159	0.0287501547213063
13181	0.0287501547213063
13479	0.0119382345040958
13849	0.0324326041493784
14095	0.0165577707991816
14560	0.021927918569129
14570	0.0216467312250046
14590	0.0223442434314682
14599	0.0231777061074362
14915	0.0211072869743483
14944	0.0167003405682246
15004	0.0114777861893917
15013	0.0129461263016966
15156	0.0213134139005582
16232	0.00671189885952106
18373	0.0146159876584822
19924	0.00852137417784049
19997	0.00809391188283397
20346	0.0193227348665261
20347	0.0193227348665261
20741	0.0161951194823693
20823	0.0155911467019796
21068	0.018758558136252
25338	0.0186660776313451
25389	0.00858502409483397
25767	0.0234915803468734
25802	0.0235358549247985
25844	0.0245041174315225
25858	0.0236008660140793
25907	0.0281610943858543
25950	0.0308103734002004
25951	0.03068934058686
26004	0.0264790283372724
26028	0.0288954822712625
26344	0.0468019788651842
26948	0.0261727666570905
27523	0.0091304164390924
27689	0.0281195869690495
28366	0.0392744845398969
28442	0.0241897846041784
28454	0.0359281685829179
28469	0.0367163561255275
28677	0.023582048276216
28690	0.00996235952149603
28762	0.0451208216544543
29111	0.0302141517976834
29494	0.0580314469986818
29497	0.0580314469986818
29548	0.0549223867065872
29751	0.0338326052833413
29978	0.0284611567913304
30006	0.0100643442607744
30019	0.0114412971834323
30023	0.0114412971834323
30076	0.0142415006046898
30087	0.0141100495078997
30097	0.0164610202155138
30128	0.00855307198241759
30357	0.0273943437434039
30386	0.00774103265742061
30392	0.00774103265742061
30395	0.0279914491698871
30426	0.0151503676395026
30427	0.0151503676395026
30513	0.0171471636108661
30546	0.0355400208207248
30615	0.030053840930113
30635	0.00968362145369281
30642	0.0112545143289335
30652	0.0282573102977123
31486	0.0295885294991048
31490	0.0283851114516613
31529	0.0173876231376276
31568	0.0168565439472921
31739	0.0120564501285443
31741	0.0121082288722194
31747	0.0120564501285443
31751	0.0102923051825811
31865	0.0190241587027665
31868	0.0216898395305028
31873	0.0216898395305028
31925	0.0205184924114332
31926	0.021224384269651
32547	0.0215720574800753
33202	0.0155287151696752
33595	0.0337976389976819
33730	0.0246012890822685
34039	0.0138575968651264
34042	0.0138575968651264
34247	0.0196094336034958
34248	0.018303958901852
34309	0.0268219687120479
34680	0.0206908693521825
34689	0.0167897287314954
34793	0.0219864541887148
34864	0.0182776422094649
35496	0.0265760509469486
35919	0.0129812499663876
36025	0.0283867352697499
36160	0.0321988233301345
36573	0.0276455540298475
37395	0.0036005310364583
37455	0.00446312238247924
37857	0.014697833092929
37946	0.0117782905068509
38028	0.0122696591111807
38301	0.0178705057811884
38698	0.0108755695922365
38720	0.0150713737880407
41014	0.0144445977239782
41026	0.0173371065529418
41038	0.0218427775552237
41986	0.0198773385742427
42149	0.0204238200647801
42601	0.0201678321261424
43184	0.0178253650974664
43251	0.030342968098499
43657	0.00650513512146764
43692	0.0122998268997411
43717	0.0123776450985687
44029	0.0136534449936521
44129	0.0194217898544263
44170	0.0123895193986228
44413	0.0195257965494762
44455	0.0195381450711159
44583	0.0309216643472541
44584	0.0309216643472541
44738	0.0442623742755197
45807	0.0193863441359552
45842	0.0172285369082178
46400	0.0253634444654422
46401	0.0253634444654422
46469	0.0253993237579345
46478	0.025751419214925
46675	0.02552012102385
46834	0.0226462256526821
46921	0.0240033040008001
47041	0.0361351240940961
47809	0.0238456414783924
47979	0.00931211105231458
47988	0.00606500850451273
48275	0.0188791917696645
48316	0.0178065963451295
48499	0.0131239802411981
49228	0.00922088124169929
49920	0.0181627357136631
49923	0.0181627357136631
49934	0.0292715483265981
49964	0.0187068919550632
50822	0.0200913063114161
51065	0.0366604709355948
51075	0.0454976016477814
51078	0.0454976016477814
51085	0.0410561360792077
51321	0.0175426175122131
51357	0.026205683888602
51497	0.00898381943443019
51551	0.0186679964048375
51553	0.0186679964048375
51629	0.0257447207047479
51639	0.0214780928179422
51799	0.0145736099668995
51816	0.0183359485350972
51981	0.00989439679368678
52221	0.00953931217733908
52223	0.0103545428572703
52237	0.0126653058278977
52461	0.011504390541466
53240	0.0111969990674406
53270	0.0143808654696105
53299	0.00485434372589419
53368	0.0141910225830781
53423	0.0282019128785534
53590	0.00899267851899618
54244	0.0110179705175502
54920	0.0211986032913188
54932	0.0198408964693192
55568	0.00990631903702208
55912	0.0115806860199935
56683	0.0220367644088424
56873	0.0131191306740822
56948	0.0485880078345158
57020	0.0371920660373256
57944	0.0367990947641476
58348	0.0160534856495545
59208	0.0394589786238419
59727	0.0198254993803435
59832	0.0519235355109839
59846	0.0413320809297595
59877	0.0449065402014627
59890	0.0529933252113246
59942	0.0508655721674161
59955	0.0522273291544302
59981	0.0320168556486586
61077	0.00826068883989226
63290	0.0276608416830727
63311	0.0201041175899438
63635	0.0266668701129381
63715	0.0210311457481168
63886	0.0117083058232701
64078	0.0102095498680371
64080	0.00913370263834376
64191	0.003686141060723
64195	0.00398258374847003
64353	0.0227314229478306
64557	0.0104380652643132
64623	0.00646669711690369
64951	0.0205938092216775
65068	0.0254743487395107
65112	0.0286183732327742
65223	0.0311171259778918
65299	0.0277658374688582
65344	0.00523486016841768
66046	0.0229881717254957
66075	0.0464342497295478
66340	0.0186327091076434
66626	0.0196113284053477
66933	0.0089232222537536
66990	0.0376451550583684
67110	0.0250627421213868
67428	0.00274797963886367
67440	0.0210541116220475
67464	0.0112059248557022
67470	0.0347222032881003
67471	0.00962038530806081
67480	0.00962038530806081
67482	0.00916192768177101
67547	0.00986143474562984
67654	0.0131470722268033
68158	0.0178967505586539
68166	0.016343485177209
68215	0.0195041293131183
68220	0.00962209980148562
68237	0.0462624929247182
68276	0.00886199034572399
68295	0.0288040398426176
68317	0.0289530923770725
68370	0.0405598136832376
68383	0.0392933199959294
68431	0.0206189440079591
68726	0.00635342486164298
68732	0.0114870392426596
68768	0.0146909501053439
68841	0.0160681823497269
68906	0.00745550019287788
69052	0.00963589391727751
69073	0.0239320467357775
69074	0.0228817209653509
69498	0.0323176257386548
69803	0.0332858799074169
69947	0.0166847193965217
70081	0.0224337983539779
70273	0.0201005406042696
70278	0.0173562671894902
70282	0.0201005406042696
70701	0.0146926010218089
72108	0.0150301675801113
72109	0.0150301675801113
72111	0.0150301675801113
72315	0.0110396773592274
72508	0.00870194212395489
72555	0.00970186491442729
72777	0.0175625410722794
72881	0.00951755322339978
73010	0.00685265199510546
73115	0.0431492688628775
73307	0.00837496894630299
73938	0.0269148181717709
74243	0.0204558253317039
74717	0.0224530621728053
74933	0.012028572152783
74942	0.0266636839692301
75432	0.0375992973099191
75443	0.0250533983927828
75509	0.0240286326446969
76392	0.0302517018093002
76456	0.0238391274456233
76488	0.0330850152774392
76498	0.0318018123143944
76768	0.0114745427221953
76915	0.0173225244997463
77090	0.0388917971005321
77112	0.0470709073207598
77114	0.0158136076956387
77117	0.0158136076956387
77510	0.0284295798872016
77512	0.0284295798872016
78093	0.0158900126099167
78433	0.0329648318939718
78442	0.0336707237521896
78568	0.0210766491331834
78691	0.0144799923724324
79027	0.014470552757266
79068	0.0146673838981531
79119	0.00832620124913509
79155	0.00582376520932848
80387	0.00417390349651181
81647	0.0263856181496086
81655	0.0263856181496086
82261	0.0353719598175271
82468	0.0448504809565743
83125	0.0351308217891123
83307	0.0204143033234657
83440	0.0564557472883801
84076	0.0283564955662679
86328	0.0505286788995408
86340	0.0525295677679738
86717	0.010246988359413
87206	0.0235719770604323
87276	0.0187511915468741
87364	0.0405844898816122
87595	0.0390284979866115
87709	0.0250235391088144
87714	0.0252290875889145
87836	0.0209538174045533
87839	0.0297102783349273
87845	0.0242476469333372
87851	0.020871913604373
87858	0.0304575817233875
87984	0.0260264646078321
88326	0.0390171250065192
88600	0.00915721986000811
88953	0.0152519907196816
89437	0.030949939418453
90392	0.0220174495199981
90601	0.0165680035629779
91363	0.0321839358990826
91392	0.00435348652087159
91979	0.0247460361016242
91988	0.0248145949937126
91991	0.0244233778192786
92042	0.0198958019487235
93274	0.00928899613731404
93337	0.0338834460062976
93444	0.0202834807005572
93751	0.0252621027914788
93830	0.0233313476476963
93887	0.0180535959607911
95333	0.0125297409891333
98047	0.0374622827080216
98383	0.00671399689919533
98916	0.0320213122893179
99350	0.0321854065071206
99359	0.0321854065071206
99455	0.054408585857891
100728	0.0198342677895734
101118	0.0243382639037496
102529	0.0453845044897216
103287	0.0233023846946369
103848	0.00744355293565674
103885	0.0259229654862155
104025	0.0164101919995004
104555	0.0152938712602833
104697	0.0194154259049722
104889	0.0123247240541072
104901	0.00668882042310401
105038	0.0369478054421627
105152	0.0132117789804732
105182	0.0393043302746771
105207	0.0259915077023799
105219	0.0249425566534289
107419	0.0125529601286581
107961	0.0220560334388961
107968	0.0181269616879403
108132	0.0463781946536405
108175	0.0283376590679901
108205	0.0320587247245627
108380	0.0214286685062712
109115	0.0191429381818916
109313	0.013163168662337
109384	0.0238798021084788
109925	0.0118196395023787
109952	0.0137692592850606
110226	0.0175658616656238
110377	0.0223085204757624
110465	0.02723879906333
110468	0.0270370777077625
110469	0.02723879906333
110505	0.0187972389839576
110516	0.0217516947011876
110534	0.0202904762506286
110543	0.0247888682121329
110558	0.0225338622352733
110876	0.0128442176463209
110900	0.0243533566571142
110910	0.0173812060336661
110960	0.0178107246785372
111270	0.0148274831899391
111276	0.0146135362976705
111367	0.0124933093066622
111387	0.0131523782973356
111543	0.0209178443099893
111551	0.0224896168402151
111714	0.0185459442756494
111760	0.00962513794636916
111761	0.0269949220144166
111873	0.0274068975873565
111876	0.0274068975873565
111909	0.0175162351583756
112145	0.0233757129009575
112151	0.0233659324715966
112161	0.0211164337186014
112197	0.0207644091342873
112366	0.0135624413502546
112368	0.0135624413502546
112406	0.014965163786547
112590	0.0234443958202297
112603	0.0204490215547573
112741	0.0217371376618779
112914	0.0314701219347724
112983	0.0427506840568204
113003	0.0354573144917072
113051	0.0416340099964659
113165	0.0187584424470301
113492	0.0267615382906102
113501	0.0256579423235657
113504	0.0256579423235657
113522	0.0111842909711921
113637	0.013299816393909
113677	0.0131894322002168
113899	0.0288216412802824
114229	0.0401486792022088
114306	0.0359015621463532
114307	0.0359015621463532
114356	0.0455892431452677
114357	0.0455892431452677
114360	0.0485233719535224
115184	0.0227401350758173
115564	0.00720699140610431
115574	0.0245502023894348
116449	0.0203865243610026
116914	0.00285447625779928
116941	0.0163531478328574
117041	0.0379077789724687
117046	0.0478778636157063
117082	0.0134910590158028
117310	0.00967699485843751
117498	0.0251464448368567
117601	0.0196405821448298
117740	0.0191406171017352
117924	0.0254589224676682
118704	0.0268976680262964
118732	0.0196487220801781
119225	0.0856238142115308
119492	0.048072497703621
119509	0.0431004782363143
119550	0.0442706747166354
120102	0.0209506906688242
120113	0.0156262568174824
120169	0.020908980014197
120173	0.019790609178587
120177	0.0171134824135915
121965	0.034507730061984
122258	0.0283959570556605
122465	0.0247234683653763
122641	0.0145921702701879
122644	0.0145921702701879
122653	0.013867195943815
122802	0.0421655300565393
123994	0.0253203465823965
123999	0.00963194172331583
124036	0.0437027584104293
124216	0.0182714377235329
125623	0.0491499333150648
125857	0.0209168322898583
126693	0.0140675530003594
126698	0.00479655435390236
126743	0.00471666312928629
127667	0.0096677855794698
127740	0.00837225077070909
128204	0.00782907840881836
128446	0.00916892218959717
128688	0.0543170850635125
128855	0.0212131175985736
128892	0.023524103609683
129006	0.0508570611927613
129045	0.0542972209114251
129081	0.0420207559388072
129107	0.0516912742853043
129195	0.0105647147372685
129277	0.0104651125706158
130424	0.0145862086273976
130445	0.0166018400547937
130455	0.0115909417131852
130481	0.0275076180831551
130628	0.0105668013122451
130629	0.0111291228459865
131299	0.026431570742375
132499	0.0210349134646704
133047	0.0216831389358351
134164	0.0235428775732462
134218	0.0177908052874519
134305	0.0200749607792693
134330	0.0109928294777972
134347	0.0136607104852414
134794	0.0233922022629479
135164	0.0160777668369821
135206	0.0221910135780792
135744	0.0290832271181206
136695	0.0136772915648132
136741	0.0138146042488503
139741	0.00525114733483095
139757	0.00641379587510182
139758	0.00641379587510182
139791	0.0145737600502145
139826	0.0181120659189266
139941	0.0160492259932462
139952	0.016383265593646
140062	0.0202227928445445
140206	0.0152129992828935
140215	0.0115914586668258
140233	0.0204671983117962
142328	0.0158011382735508
142405	0.0220010716782487
142488	0.0256291888618002
142803	0.0165937939215173
143219	0.0422369749257056
143656	0.0174161796150421
143715	0.0448629753925481
144110	0.0117814974954638
144112	0.0101597847421717
144142	0.0340032833643443
144611	0.0283888291404433
144651	0.023820130441578
144969	0.0224611677140606
145083	0.0274916217031646
145084	0.0248919285485022
145964	0.0364013771061327
146093	0.0528903253251795
146110	0.0135241190349126
146111	0.0554332369590002
146114	0.0528903253251795
146162	0.0405440393014839
146219	0.0419317263079
146252	0.037712964576127
146303	0.0377385829642013
146306	0.0289000264605222
146356	0.0367087644111771
146379	0.0303197301985598
146540	0.0162743322053321
146567	0.0513360927401491
146600	0.0396054807841869
146996	0.0174470644683296
147242	0.0629842120273683
147940	0.0181470186553978
148084	0.0169086926880284
148432	0.00926182063484662
148455	0.00886075111613005
148503	0.00798662524200414
148561	0.0112912597272227
148599	0.0154947880025232
148889	0.0205393581611992
148903	0.0230731501491432
148910	0.0230731501491432
148992	0.0190708439939388
150104	0.0299769055130062
150230	0.0288097419663424
150252	0.0283951399353899
150253	0.0283951399353899
150280	0.0355654172105624
151001	0.0051125506046544
151315	0.0228138040963323
151535	0.0155961703240511
151582	0.0311078426995119
151941	0.0294164037394592
151971	0.00183842784892631
151973	0.00892618327248915
152108	0.0156191163953223
152969	0.0183248309050895
153364	0.0280245613012591
153395	0.0243044565948005
153401	0.0235795541833494
153476	0.0292397796493445
153532	0.0216273454634837
153553	0.0214085083565348
153686	0.0284832346723141
153973	0.0150150935871609
153988	0.0206457505556105
154061	0.0261670249280465
154306	0.00949551703222584
154349	0.0647092613120192
154797	0.0480384902835854
154821	0.0480384902835854
154830	0.050421885240711
155133	0.00936147491376152
155137	0.00936722810750318
155162	0.00720105165046411
155166	0.00720105165046411
155200	0.011273165307558
155834	0.0119745921871546
155921	0.0421553712921552
156439	0.0434166005987407
156444	0.0396660185568847
156447	0.0396660185568847
156450	0.0407971464742699
156452	0.0390451739105004
156646	0.0540327480542636
156649	0.0589425235934098
156701	0.024369692809054
156933	0.0141311768612218
157207	0.0063199020856453
157482	0.0552265493048495
157483	0.0567914180025854
157787	0.0430777249804131
157788	0.0430777249804131
157792	0.0430777249804131
157801	0.0187618849830679
157829	0.0223838331170257
157874	0.0493678136408807
157942	0.0332606346431396
158076	0.0545087862733133
158111	0.0545217309592321
158175	0.0483282824044364
158191	0.0197056964163898
158245	0.0149883975175052
158557	0.0133916913543297
158633	0.020568400324897
158827	0.0538892611094067
158866	0.0320930448181714
158896	0.00545285097222928
158899	0.00545285097222928
158918	0.00730714596273593
158968	0.0433311656716768
159014	0.0496660323145219
159055	0.0241988573490192
159283	0.0187842880445674
159289	0.0219722296256376
159361	0.01898888287027
159557	0.0262505640110133
159565	0.01480746165882
159567	0.01480746165882
159711	0.00216911975760543
160147	0.0178277653882611
160271	0.0263957320974473
160277	0.0259152685050956
160287	0.0288432845449997
160310	0.0338324552000262
160311	0.0338324552000262
160396	0.0355049211276743
160404	0.0360575393582029
160500	0.0447613179182761
160748	0.0442640960646612
160876	0.0490583668592361
160884	0.0534127841051097
160886	0.0534127841051097
160894	0.0572668016916224
160897	0.0580291467634304
