# Supplementary material for: Effects of multiple sources of genetic drift on pathogen variation within hosts
Source: PLoS Biol. 2018 Mar 28;16(3):e2004444. doi: 10.1371/journal.pbio.2004444 (PMC5891033; doi:10.1371/journal.pbio.2004444)
Supplement: S12 Data — (CSV) [file pbio.2004444.s013.csv]

Locus	MajorAlleleFrequency
535	0.993333333333333
1179	0.993548387096774
2214	0.993265993265993
2220	0.993220338983051
2288	0.993311036789298
3859	0.982078853046595
4300	0.9921875
4318	0.985185185185185
4476	0.985663082437276
4477	0.98932384341637
4793	0.989966555183946
4812	0.986842105263158
4890	0.986159169550173
4895	0.982758620689655
4899	0.986111111111111
4909	0.993265993265993
5285	0.990625
5330	0.993939393939394
5499	0.987381703470032
5513	0.976510067114094
5657	0.993079584775087
5891	0.982394366197183
5974	0.989864864864865
6266	0.993569131832797
6267	0.990415335463259
6279	0.99
6406	0.992565055762082
6908	0.982758620689655
7347	0.993464052287582
7447	0.986666666666667
7502	0.987179487179487
7503	0.993650793650794
7528	0.983333333333333
7569	0.985347985347985
7573	0.98876404494382
7647	0.98705501618123
7716	0.993710691823899
7935	0.996805111821086
7937	0.987767584097859
7945	0.984567901234568
7974	0.989864864864865
8323	0.99
8324	0.989966555183946
8402	0.989761092150171
8476	0.986798679867987
8477	0.993355481727575
8613	0.990291262135922
8614	0.980392156862745
8702	0.989169675090253
8865	0.986486486486487
9918	0.986440677966102
10081	0.989090909090909
10526	0.987096774193548
12413	0.983766233766234
12456	0.985611510791367
12862	0.98989898989899
12903	0.990033222591362
12933	0.986754966887417
12951	0.987220447284345
12952	0.990415335463259
13042	0.98993288590604
13043	0.983164983164983
13044	0.97972972972973
13065	0.982394366197183
13112	0.982698961937716
13159	0.985663082437276
13181	0.989547038327526
13479	0.993650793650794
13849	0.97979797979798
14095	0.990625
14560	0.986842105263158
14570	0.986531986531986
14590	0.986798679867987
14599	0.986486486486487
14915	0.989583333333333
14944	0.993311036789298
15004	0.98961937716263
15013	0.989761092150171
15156	0.989761092150171
16232	0.993355481727575
18373	0.978947368421053
19924	0.989090909090909
19997	0.980769230769231
20346	0.993079584775087
20347	0.996478873239437
20741	0.990683229813665
20823	0.98705501618123
21068	0.986885245901639
25338	0.984905660377358
25389	0.996515679442509
25767	0.990445859872611
25802	0.986486486486487
25844	0.990322580645161
25858	0.993710691823899
25907	0.990353697749196
25950	0.983050847457627
25951	0.98961937716263
26004	0.982638888888889
26028	0.989864864864865
26344	0.996527777777778
26948	0.987138263665595
27523	0.990625
27689	0.990566037735849
28366	0.987096774193548
28442	0.990291262135922
28454	0.989510489510489
28469	0.982269503546099
28677	0.99290780141844
28690	0.99016393442623
28762	0.983277591973244
29111	0.989547038327526
29494	0.993485342019544
29497	0.990322580645161
29548	0.993197278911565
29751	0.993103448275862
29978	0.983516483516483
30006	0.995
30019	0.989637305699482
30023	0.985576923076923
30076	0.980916030534351
30087	0.984
30097	0.988235294117647
30128	0.995967741935484
30357	0.99203187250996
30386	0.993288590604027
30392	0.98989898989899
30395	0.986111111111111
30426	0.993485342019544
30427	0.993506493506494
30513	0.977859778597786
30546	0.996296296296296
30615	0.984848484848485
30635	0.996282527881041
30642	0.992805755395683
30652	0.984790874524715
31486	0.993127147766323
31490	0.989547038327526
31529	0.993630573248408
31568	0.980327868852459
31739	0.986666666666667
31741	0.993464052287582
31747	0.996644295302013
31751	0.99
31865	0.99
31868	0.986666666666667
31873	0.989547038327526
31925	0.98804780876494
31926	0.98804780876494
32547	0.989830508474576
33202	0.993103448275862
33595	0.988970588235294
33730	0.987220447284345
34039	0.986159169550173
34042	0.993220338983051
34247	0.993220338983051
34248	0.986486486486487
34309	0.990566037735849
34680	0.99375
34689	0.990595611285266
34793	0.98943661971831
34864	0.980645161290323
35496	0.987381703470032
35919	0.989830508474576
36025	0.989090909090909
36160	0.983108108108108
36573	0.986206896551724
37395	0.98943661971831
37455	0.98989898989899
37857	0.993421052631579
37946	0.989761092150171
38028	0.985401459854015
38301	0.992779783393502
38698	0.99016393442623
38720	0.98780487804878
41014	0.985347985347985
41026	0.992619926199262
41038	0.996363636363636
41986	0.993569131832797
42149	0.985454545454545
42601	0.993485342019544
43184	0.986013986013986
43251	0.993265993265993
43657	0.993670886075949
43692	0.99375
43717	0.993769470404984
44029	0.984790874524715
44129	0.982698961937716
44170	0.978947368421053
44413	0.992982456140351
44455	0.989090909090909
44583	0.983277591973244
44584	0.986577181208054
44738	0.993788819875776
45807	0.989169675090253
45842	0.989169675090253
46400	0.983277591973244
46401	0.983660130718954
46469	0.990536277602524
46478	0.987730061349693
46675	0.989830508474576
46834	0.996539792387543
46921	0.981132075471698
47041	0.992125984251969
47809	0.987012987012987
47979	0.989690721649485
47988	0.98961937716263
48275	0.992779783393502
48316	0.98576512455516
48499	0.981949458483754
49228	0.987951807228916
49920	0.993288590604027
49923	0.99344262295082
49934	0.986440677966102
49964	0.993670886075949
50822	0.992831541218638
51065	0.988970588235294
51075	0.989051094890511
51078	0.992673992673993
51085	0.988970588235294
51321	0.993464052287582
51357	0.989583333333333
51497	0.982142857142857
51551	0.993288590604027
51553	0.993355481727575
51629	0.988549618320611
51639	0.981412639405205
51799	0.993464052287582
51816	0.990066225165563
51981	0.985964912280702
52221	0.982014388489209
52223	0.986394557823129
52237	0.993333333333333
52461	0.979933110367893
53240	0.989795918367347
53270	0.989761092150171
53299	0.996389891696751
53368	0.98932384341637
53423	0.98932384341637
53590	0.987421383647799
54244	0.981072555205047
54920	0.989583333333333
54932	0.986254295532646
55568	0.983766233766234
55912	0.988847583643123
56683	0.987951807228916
56873	0.996732026143791
56948	0.99388379204893
57020	0.983974358974359
57944	0.993569131832797
58348	0.993650793650794
59208	0.986798679867987
59727	0.993150684931507
59832	0.990196078431373
59846	0.989399293286219
59877	0.993464052287582
59890	0.993174061433447
59942	0.989473684210526
59955	0.992727272727273
59981	0.992805755395683
61077	0.982638888888889
63290	0.986159169550173
63311	0.989399293286219
63635	0.985815602836879
63715	0.99016393442623
63886	0.985964912280702
64078	0.978798586572438
64080	0.996587030716723
64191	0.992673992673993
64195	0.988805970149254
64353	0.989510489510489
64557	0.987096774193548
64623	0.98576512455516
64951	0.993333333333333
65068	0.993399339933993
65112	0.985507246376812
65223	0.98993288590604
65299	0.988679245283019
65344	0.988095238095238
66046	0.98828125
66075	0.984732824427481
66340	0.978021978021978
66626	0.986111111111111
66933	0.989510489510489
66990	0.989090909090909
67110	0.990712074303406
67428	0.984567901234568
67440	0.987616099071207
67464	0.993464052287582
67470	0.984126984126984
67471	0.996825396825397
67480	0.990384615384615
67482	0.990196078431373
67547	0.989473684210526
67654	0.981203007518797
68158	0.983471074380165
68166	0.985915492957746
68215	0.988679245283019
68220	0.992831541218638
68237	0.980519480519481
68276	0.99344262295082
68295	0.983221476510067
68317	0.99
68370	0.98932384341637
68383	0.988929889298893
68431	0.99601593625498
68726	0.981060606060606
68732	0.984674329501916
68768	0.989090909090909
68841	0.993710691823899
68906	0.992753623188406
69052	0.99
69073	0.993506493506494
69074	0.993527508090615
69498	0.993710691823899
69803	0.98989898989899
69947	0.98993288590604
70081	0.990445859872611
70273	0.984126984126984
70278	0.992277992277992
70282	0.996309963099631
70701	0.992727272727273
72108	0.992700729927007
72109	0.985239852398524
72111	0.977859778597786
72315	0.981549815498155
72508	0.986928104575163
72555	0.986842105263158
72777	0.99016393442623
72881	0.984076433121019
73010	0.985294117647059
73115	0.990476190476191
73307	0.987138263665595
73938	0.990445859872611
74243	0.996389891696751
74717	0.984326018808777
74933	0.99250936329588
74942	0.985074626865672
75432	0.984126984126984
75443	0.993527508090615
75509	0.98993288590604
76392	0.987341772151899
76456	0.990322580645161
76488	0.986486486486487
76498	0.990033222591362
76768	0.996515679442509
76915	0.986622073578595
77090	0.996491228070175
77112	0.986013986013986
77114	0.985915492957746
77117	0.981617647058823
77510	0.983974358974359
77512	0.986798679867987
78093	0.988142292490119
78433	0.983606557377049
78442	0.990445859872611
78568	0.98936170212766
78691	0.992673992673993
79027	0.996309963099631
79068	0.985915492957746
79119	0.996610169491525
79155	0.986842105263158
80387	0.980132450331126
81647	0.989247311827957
81655	0.989208633093525
82261	0.987301587301587
82468	0.989795918367347
83125	0.987301587301587
83307	0.987692307692308
83440	0.993690851735016
84076	0.990228013029316
86328	0.993939393939394
86340	0.993957703927492
86717	0.978494623655914
87206	0.993399339933993
87276	0.993333333333333
87364	0.992647058823529
87595	0.992673992673993
87709	0.986440677966102
87714	0.993311036789298
87836	0.996478873239437
87839	0.985611510791367
87845	0.989547038327526
87851	0.985865724381625
87858	0.982394366197183
87984	0.993079584775087
88326	0.993485342019544
88600	0.991561181434599
88953	0.996376811594203
89437	0.993031358885017
90392	0.988847583643123
90601	0.986577181208054
91363	0.992932862190813
91392	0.993243243243243
91979	0.989966555183946
91988	0.993485342019544
91991	0.983108108108108
92042	0.993311036789298
93274	0.987616099071207
93337	0.990196078431373
93444	0.993243243243243
93751	0.993377483443709
93830	0.975438596491228
93887	0.989864864864865
95333	0.984025559105431
98047	0.993079584775087
98383	0.989655172413793
98916	0.993788819875776
99350	0.98989898989899
99359	0.993127147766323
99455	0.98972602739726
100728	0.988970588235294
101118	0.99290780141844
102529	0.985964912280702
103287	0.993485342019544
103848	0.989510489510489
103885	0.988970588235294
104025	0.986622073578595
104555	0.989010989010989
104697	0.986062717770035
104889	0.989795918367347
104901	0.989655172413793
105038	0.982638888888889
105152	0.989583333333333
105182	0.988929889298893
105207	0.992481203007519
105219	0.98936170212766
107419	0.993103448275862
107961	0.986159169550173
107968	0.986013986013986
108132	0.993103448275862
108175	0.982578397212544
108205	0.98961937716263
108380	0.983606557377049
109115	0.989583333333333
109313	0.981191222570533
109384	0.993265993265993
109925	0.986798679867987
109952	0.986798679867987
110226	0.989169675090253
110377	0.983974358974359
110465	0.989169675090253
110468	0.989130434782609
110469	0.992831541218638
110505	0.989966555183946
110516	0.993288590604027
110534	0.980327868852459
110543	0.986928104575163
110558	0.987220447284345
110876	0.992982456140351
110900	0.992957746478873
110910	0.985663082437276
110960	0.98936170212766
111270	0.993630573248408
111276	0.990536277602524
111367	0.984905660377358
111387	0.991701244813278
111543	0.989690721649485
111551	0.983050847457627
111714	0.982817869415808
111760	0.981012658227848
111761	0.990595611285266
111873	0.98876404494382
111876	0.989010989010989
111909	0.988326848249027
112145	0.993610223642173
112151	0.99025974025974
112161	0.993103448275862
112197	0.986798679867987
112366	0.984662576687117
112368	0.990769230769231
112406	0.990595611285266
112590	0.990384615384615
112603	0.97887323943662
112741	0.990506329113924
112914	0.987220447284345
112983	0.987730061349693
113003	0.993808049535604
113051	0.990536277602524
113165	0.989690721649485
113492	0.989795918367347
113501	0.98671096345515
113504	0.986440677966102
113522	0.986754966887417
113637	0.990566037735849
113677	0.986013986013986
113899	0.986798679867987
114229	0.990228013029316
114306	0.993197278911565
114307	0.986666666666667
114356	0.972222222222222
114357	0.989864864864865
114360	0.97972972972973
115184	0.989761092150171
115564	0.993730407523511
115574	0.989795918367347
116449	0.990654205607477
116914	0.993288590604027
116941	0.99
117041	0.986666666666667
117046	0.993288590604027
117082	0.99
117310	0.989473684210526
117498	0.990033222591362
117601	0.989795918367347
117740	0.990131578947368
117924	0.984662576687117
118704	0.99025974025974
118732	0.996527777777778
119225	0.985130111524164
119492	0.97923875432526
119509	0.993464052287582
119550	0.993527508090615
120102	0.99288256227758
120113	0.985714285714286
120169	0.99290780141844
120173	0.993055555555556
120177	0.99288256227758
121965	0.985915492957746
122258	0.996666666666667
122465	0.993630573248408
122641	0.986531986531986
122644	0.986254295532646
122653	0.993399339933993
122802	0.989761092150171
123994	0.990990990990991
123999	0.993846153846154
124036	0.980952380952381
124216	0.988847583643123
125623	0.983164983164983
125857	0.985915492957746
126693	0.993355481727575
126698	0.990353697749196
126743	0.990322580645161
127667	0.996138996138996
127740	0.996587030716723
128204	0.992537313432836
128446	0.98371335504886
128688	0.990769230769231
128855	0.993993993993994
128892	0.987138263665595
129006	0.992982456140351
129045	0.986206896551724
129081	0.992831541218638
129107	0.986577181208054
129195	0.983818770226537
129277	0.996875
130424	0.990322580645161
130445	0.983221476510067
130455	0.996644295302013
130481	0.986928104575163
130628	0.993506493506494
130629	0.986622073578595
131299	0.989473684210526
132499	0.980769230769231
133047	0.987261146496815
134164	0.99622641509434
134218	0.98876404494382
134305	0.985454545454545
134330	0.989655172413793
134347	0.986531986531986
134794	0.986013986013986
135164	0.993031358885017
135206	0.987179487179487
135744	0.986798679867987
136695	0.989547038327526
136741	0.993485342019544
139741	0.985915492957746
139757	0.988461538461539
139758	0.992452830188679
139791	0.988929889298893
139826	0.996428571428571
139941	0.979591836734694
139952	0.996062992125984
140062	0.996389891696751
140206	0.989208633093525
140215	0.996466431095406
140233	0.974729241877256
142328	0.993288590604027
142405	0.993055555555556
142488	0.98972602739726
142803	0.987179487179487
143219	0.993311036789298
143656	0.979166666666667
143715	0.982935153583618
144110	0.989399293286219
144112	0.993079584775087
144142	0.98220640569395
144611	0.985645933014354
144651	0.975806451612903
144969	0.979661016949153
145083	0.99672131147541
145084	0.990228013029316
145964	0.992857142857143
146093	0.990853658536585
146110	0.996805111821086
146111	0.983766233766234
146114	0.99009900990099
146162	0.977346278317152
146219	0.993377483443709
146252	0.993527508090615
146303	0.977917981072555
146306	0.990506329113924
146356	0.990476190476191
146379	0.986754966887417
146540	0.98961937716263
146567	0.976027397260274
146600	0.990291262135922
146996	0.990066225165563
147242	0.989830508474576
147940	0.993355481727575
148084	0.993265993265993
148432	0.996428571428571
148455	0.996323529411765
148503	0.992673992673993
148561	0.98961937716263
148599	0.977695167286245
148889	0.98406374501992
148903	0.988505747126437
148910	0.996268656716418
148992	0.990033222591362
150104	0.993055555555556
150230	0.986577181208054
150252	0.993650793650794
150253	0.990476190476191
150280	0.99079754601227
151001	0.986486486486487
151315	0.987951807228916
151535	0.993650793650794
151582	0.993377483443709
151941	0.987381703470032
151971	0.983818770226537
151973	0.987538940809969
152108	0.98993288590604
152969	0.983974358974359
153364	0.989655172413793
153395	0.986206896551724
153401	0.993174061433447
153476	0.993865030674847
153532	0.993399339933993
153553	0.99016393442623
153686	0.985964912280702
153973	0.993527508090615
153988	0.986970684039088
154061	0.982935153583618
154306	0.990384615384615
154349	0.990909090909091
154797	0.986486486486487
154821	0.983974358974359
154830	0.990033222591362
155133	0.996815286624204
155137	0.983333333333333
155162	0.986577181208054
155166	0.986666666666667
155200	0.985815602836879
155834	0.985714285714286
155921	0.98932384341637
156439	0.984375
156444	0.984227129337539
156447	0.99112426035503
156450	0.98780487804878
156452	0.985029940119761
156646	0.996875
156649	0.993670886075949
156701	0.993993993993994
156933	0.992592592592593
157207	0.99009900990099
157482	0.986622073578595
157483	0.990033222591362
157787	0.98943661971831
157788	0.982517482517482
157792	0.982758620689655
157801	0.993197278911565
157829	0.996212121212121
157874	0.989051094890511
157942	0.989966555183946
158076	0.986842105263158
158111	0.99025974025974
158175	0.989547038327526
158191	0.989655172413793
158245	0.992452830188679
158557	0.984025559105431
158633	0.984423676012461
158827	0.992217898832685
158866	0.984375
158896	0.988326848249027
158899	0.984375
158918	0.987755102040816
158968	0.989130434782609
159014	0.985815602836879
159055	0.99
159283	0.993174061433447
159289	0.990353697749196
159361	0.98936170212766
159557	0.985185185185185
159565	0.989399293286219
159567	0.992982456140351
159711	0.989169675090253
160147	0.985815602836879
160271	0.990536277602524
160277	0.990566037735849
160287	0.987012987012987
160310	0.993846153846154
160311	0.981481481481482
160396	0.989473684210526
160404	0.986394557823129
160500	0.987012987012987
160748	0.99025974025974
160876	0.983870967741935
160884	0.979838709677419
160886	0.991869918699187
160894	0.987234042553191
160897	0.991304347826087
